## **Context-dependent Requirements for FimH and Other Canonical Virulence Factors in Gut Colonization by Extraintestinal Pathogenic *Escherichia coli***

Colin W. Russell<sup>a</sup>, Brittany A. Fleming<sup>a</sup>, Alan T. Stenquist<sup>a</sup>, Morgan A. Wambaugh<sup>a</sup>, Mary P. Bronner<sup>b</sup>, Matthew A. Mulvey<sup>a\*</sup>

<sup>a</sup>University of Utah School of Medicine, Department of Pathology, Division of Microbiology and Immunology. Salt Lake City, Utah, United States of America

<sup>b</sup>Department of Pathology, ARUP Laboratories, and Huntsman Cancer Institute, University of Utah, Salt Lake City, Utah, United States of America

Running Title: ExPEC persistence within the gut

\*Address correspondence to: Matthew A Mulvey, [mulvey@path.utah.edu](mailto:mulvey@path.utah.edu)

## ABSTRACT

1 Extraintestinal pathogenic *Escherichia coli* (ExPEC) act as commensals within the mammalian  
2 gut, but can induce pathology upon dissemination to other host environments such as the urinary  
3 tract and bloodstream. It is thought that ExPEC genomes are shaped in large part by evolutionary  
4 forces encountered within the gut where the bacteria spend much of their time, provoking the  
5 question of how their extraintestinal virulence traits arose. The principle of coincidental  
6 evolution, in which a gene that evolved in one niche happens to be advantageous in another, has  
7 been used to argue that ExPEC virulence factors originated in response to selective pressures  
8 within the gut ecosystem. As a test of this hypothesis, the fitness of ExPEC mutants lacking  
9 canonical virulence factors was assessed within the intact murine gut in the absence of any  
10 antibiotic treatment. We found that most of the tested factors—including CNF1, Usp, colibactin,  
11 flagella, and the plasmid pUTI89—were dispensable for gut colonization. Deletion of genes  
12 encoding the adhesin PapG or the toxin HlyA caused transient defects, but did not affect longer-  
13 term persistence. In contrast, a mutant missing the type 1 pilus-associated adhesin FimH  
14 displayed reduced persistence within the gut. However, this phenotype was variable, being  
15 dependent on the presence of specific competing strains and partially attributable to aberrant  
16 flagellin expression by the *fimH* mutant. These data indicate that FimH and other key ExPEC-  
17 associated factors are not strictly required for gut colonization, suggesting that selective  
18 pressures within the gut do not drive the development of all extraintestinal virulence traits.

## 19 INTRODUCTION

20 The bacterium *Escherichia coli* was first described by Theodor Escherich in 1884, and  
21 has since become a critical model organism that has been used to understand the fundamentals of  
22 molecular biology (1). *E. coli* is able to live in a variety of locations, including the soil, water,  
23 and the human gut. Although it is a prominent member of the neonatal microbiota, it is quickly  
24 overshadowed by burgeoning anaerobic bacteria as oxygen becomes scarce within the gut  
25 following birth (2, 3). In adults, *E. coli* is present at about  $10^7$  to  $10^9$  Colony Forming Units  
26 (CFU)/g feces, a level that is 100-10,000-fold-lower than the resident anaerobes (4). Despite  
27 being a minor component of the microbiota, the estimated number of *E. coli* cells that are  
28 transmitted via fecal matter from each human being to the environment in a single day is  
29 staggering – about  $10^{11}$  CFU (5).

30 Understanding the role of *E. coli* within the microbiota is complicated by the fact that *E.*  
31 *coli* is a very diverse species with a wide spectrum of phenotypes (1). Some *E. coli* strains live  
32 harmlessly in the gut, while others act as pathogens, causing diarrhea and hemorrhaging (6).  
33 Others have been linked with the development of Crohn's Disease and colorectal cancer (7-9).  
34 One strain, Nissle 1917, acts as a probiotic that assuages inflammation in addition to inhibiting  
35 colonization by pathogens such as *Salmonella* (10, 11). A group of strains known as  
36 Extraintestinal Pathogenic *Escherichia coli* (ExPEC) generally act as commensals within the gut,  
37 but can disseminate to other host environments and subsequently cause disease (12). ExPEC  
38 include uropathogenic *E. coli* (UPEC), which cause the overwhelming majority of urinary tract  
39 infections (UTIs) (13). These infections are especially prevalent among women, about half of  
40 whom will have at least one UTI during their lifetime. ExPEC is also responsible for other, more  
41 serious conditions, including sepsis and neonatal meningitis (12, 14).

42           The gut is thought to be the major ExPEC reservoir that seeds extraintestinal infections.  
43 Evidence for this notion is that the same ExPEC strain can often be isolated from both the feces  
44 and urine of individual patients suffering from UTIs (15-18). Indeed, ExPEC strains are  
45 frequently difficult to clear from the gut with antibiotic treatments, even when the pathogens are  
46 effectively eliminated from the urinary tract (19). Furthermore, *E. coli* strains belonging to  
47 phylogenetic group B2, which includes many ExPEC isolates, are much more likely to be long-  
48 term residents within the gut in comparison with other *E. coli* populations (20-22). The majority  
49 of adults carry group B2 *E. coli* strains within the gut, irrespective of extraintestinal infections  
50 (22). Cumulatively these observations suggest that ExPEC primarily inhabit the gut, with  
51 sporadic departures to extraintestinal sites.

52           Given that ExPEC reside mostly within the gut, and that transmission of ExPEC among  
53 individuals likely occurs chiefly through fecal-oral routes (4, 23-25), it is expected that ExPEC  
54 genomes have been shaped in large part by the evolutionary pressures present within the gut.  
55 How then, did extraintestinal virulence factors come into being? The hypothesis of coincidental  
56 evolution has often been evoked to answer this question (26). In general terms, coincidental  
57 evolution is when a factor evolves in one context, but happens to be useful in another context as  
58 well (27). When the hypothesis of coincidental evolution is applied to the ExPEC life cycle, the  
59 implication is that factors that promote virulence in extraintestinal niches evolved in the gut for a  
60 function possibly unrelated to virulence.

61           Little concrete evidence has been put forth to support or contradict coincidental evolution  
62 in the context of ExPEC infection, other than the fact that known extraintestinal virulence factors  
63 are often encoded by gut isolates (21, 26, 28). One prediction of this hypothesis is that  
64 extraintestinal virulence factors should play a role in gut colonization. To date, this possibility

65 has only been addressed by one study in which an ExPEC mutant that lacks multiple  
66 pathogenicity-associated islands (PAIs) was found to be defective in its ability to persist within  
67 the murine intestinal tract (5). It is clear that more experimental work needs to be done to  
68 determine to what extent coincidental evolution applies to single virulence factors within  
69 ExPEC. To address this issue, several canonical virulence factors were individually deleted from  
70 a reference ExPEC isolate and the resulting mutants were tested for their ability to colonize and  
71 persist within the mouse gastrointestinal tract. Among eight virulence factors that were  
72 examined, only the type 1 pilus-associated mannose-binding adhesin FimH had a notable  
73 persistence defect within the gut. However, this defect was variable and partly contingent upon  
74 aberrant flagellin expression by the *fimH* mutant and the presence of specific competing strains.  
75 These findings are discussed in the context of both coincidental evolution and the development  
76 of anti-ExPEC therapeutics.

77

## 78 **RESULTS**

79 **ExPEC stably colonizes the murine intestinal tract in the presence of the natural, intact**  
80 **microbiota.** To examine ExPEC colonization of the intestinal tract, we employed a model in  
81 which adult specific pathogen free (SPF) Balb/c mice were intragastrically gavaged with  $\sim 10^9$   
82 CFUs of the reference cystitis isolate F11. At various time points post-gavage, feces were  
83 collected, and the numbers of viable ExPEC present were enumerated. F11 and other bacterial  
84 strains used in this study were engineered to express either chloramphenicol (Cm<sup>R</sup>) or  
85 kanamycin (Kan<sup>R</sup>) resistance cassettes so that they could be easily identified by plating fecal  
86 homogenates on selective media. Following inoculation, the fecal titers of F11 remained fairly  
87 stable for up to 75 days, with median values ranging between  $10^6$  and  $10^7$  CFU/g feces after the

88 first day (Fig. 1A). These data demonstrate that ExPEC can efficiently initiate and maintain  
89 colonization of the SPF mouse gut, in line with recent reports from our group and others (24, 29-  
90 31). Consistent with the observation that nonpathogenic *E. coli* mostly reside within the large  
91 bowel (32), the cecum and colon carried the largest load of F11 at the 2-week time point,  
92 although considerable numbers of F11 were also present within the small intestine (Fig. 1B).

93         It is of note that the SPF mice utilized in these experiments were not treated with  
94 antibiotics and therefore each possesses an intact microbiota. This is in contrast to other  
95 commonly used mouse models in which mice are treated with streptomycin and/or other  
96 antibiotics in order to disrupt the intestinal microbiota and open up niches that can then be  
97 occupied by incoming microbes (32). Since antibiotic treatment was not required for consistent  
98 colonization of the gut by F11 (or by other ExPEC isolates (24, 29)), we wondered whether  
99 ExPEC is simply more adept at gut colonization than nonpathogenic *E. coli* strains. As a test of  
100 this idea, we first competed F11 head-to-head with MG1655, an often-used nonpathogenic *E.*  
101 *coli* K12 strain. Following oral gavage with equal numbers of F11 and MG1655, the K12  
102 bacteria were cleared from all of the mice by day 3, while F11 stably persisted (Fig. 1C). When  
103 mice were gavaged with MG1655 alone, it was lost at a slower rate, but was still cleared from  
104 80% of the mice by day 14 (Fig. 1D). This is in sharp contrast to the persistent phenotype  
105 observed with F11. Similar results were obtained using SPF C57Bl/6 mice (Fig. S1A).

106         To assess whether ExPEC colonization of the colon is marked by inflammation (colitis),  
107 the mice were weighed at several time points after colonization, as weight loss frequently  
108 accompanies colitis. Mice that were gavaged with F11 consistently experienced transient weight  
109 loss at the one-day time point, in comparison to mice that were inoculated with MG1655 (Fig.  
110 1E). Since the ExPEC-associated pore forming toxin  $\alpha$ -hemolysin (HlyA) was previously shown

111 to induce inflammation within the gut in other mouse models (33-35), we hypothesized that  
112 HlyA contributes to the transient weight loss seen in F11-colonized animals. When mice were  
113 colonized with F11 $\Delta$ *hlyA*, fecal titers of the mutant were notably lower at 1 and 3 days post-  
114 inoculation, relative to wild type (WT) F11 (Fig. 1D). However, the  $\Delta$ *hlyA* mutant persisted  
115 much like the WT strain at later time points. These data, coupled with the observation that  
116 F11 $\Delta$ *hlyA* does not elicit transient weight loss by the host (Fig. 1E), suggest that HlyA both  
117 enhances initial colonization of the gut by F11 and stimulates short-term inflammation that  
118 causes transient weight loss. By the 14-day time point, the colons of mice that were gavaged with  
119 WT F11, F11 $\Delta$ *hlyA*, or MG1655 appear unperturbed, having normal crypt architecture and no  
120 evidence of infiltrating immune cells, as assessed by histological analysis. Altogether, these data  
121 indicate that F11 colonization induces transient inflammation of the intestinal tract with  
122 coordinate weight loss by the host. HlyA can facilitate these processes, but is not required for the  
123 longer-term persistence of F11 within the gut.

124

125 **Not all ExPEC-associated toxins promote ExPEC fitness within the gut.** In light of the  
126 hypothesis of coincidental evolution and observations showing that HlyA can enhance initial  
127 colonization of the gut by F11 (Fig. 1D), we wished to examine possible roles for other canonical  
128 ExPEC-associated toxins as mediators of intestinal colonization. The first of these was cytotoxic  
129 necrotizing factor type 1 (CNF1), a secreted toxin that catalyzes the deamidation of a specific  
130 glutamine residue within Rho family GTPases (36). This causes constitutive activation of Rho  
131 GTPases, leading to aberrant host cytoskeletal rearrangements and multinucleation (2, 37, 38).  
132 CNF1 has been linked with ExPEC strains in epidemiological studies (38), and can enhance host  
133 inflammatory responses and ExPEC virulence in mouse models of UTI (39) and prostatitis (40).

134 However, the effects of CNF1 on ExPEC fitness within the host remain unclear, clouded  
135 somewhat by conflicting reports (39-42). To test if CNF1 plays a role in the gut, mice were  
136 gavaged with  $10^9$  CFU of either WT F11 or F11 $\Delta$ *cnf1* and intestinal colonization levels were  
137 tracked by homogenizing and plating feces at various time points. Median bacterial levels for  
138 both the WT and mutant strains ranged between  $10^5$  and  $10^6$  CFU per gram of feces over the  
139 course of two weeks (Fig. 2A). At no point were the WT and F11 $\Delta$ *cnf1* titers significantly  
140 different, suggesting that CNF1 does not impact the ability of F11 to colonize the mouse gut.

141 Like HlyA and CNF1, Uropathogenic specific protein (Usp) is often encoded by ExPEC  
142 isolates (43, 44). Usp is also associated with *E. coli* fecal isolates that are capable of long-term  
143 persistence within the human infant intestinal tract (45). Interestingly, Usp has genotoxic  
144 nuclease activity as well as homology to colicins, a group of toxins that can be used by bacteria  
145 to harm competing microbes (46-48). Given that interbacterial competition within the gut is  
146 commonplace, we tested whether Usp is important for ExPEC gut colonization. The F11 $\Delta$ *usp*  
147 mutant did not exhibit any notable defects within the gut, indicating that Usp is not required in  
148 this niche (Fig. 2B).

149 Another toxin that has been linked to ExPEC pathogenesis is colibactin, which is  
150 produced by a number of factors encoded by the polyketide synthase (*pks*) genomic island. The  
151 *pks* island is not typically carried by intestinal pathogenic *E. coli* strains, but is enriched in  
152 extraintestinal isolates relative to commensal fecal isolates (49). Colibactin induces DNA  
153 damage and cell cycle arrest in host cells (49, 50), and the presence of colibactin-producing  
154 bacteria has been linked with the development of colorectal cancer (51). In extraintestinal  
155 infections, colibactin-deficient bacterial strains are not as virulent as their WT counterparts.  
156 Mutation of the *pks* island reduces ExPEC translocation from the gut in neonatal rats (52) and



157 reduces lymphopenia in septic mice (53). Whether the *pks* island also plays a role in bacterial  
158 fitness during gut colonization is not clear. Whereas one study observed decreased colonization  
159 of the small intestines of neonatal rats by colibactin mutants (52), another found no colonization  
160 differences between a *pks* mutant and WT bacteria (54). To test whether colibactin production is  
161 important in our adult mouse model of gut colonization, we orally inoculated mice with either  
162 WT F11 or F11 $\Delta$ *clbCDEFG*, which lacks a key operon within the *pks* island (55). There was no  
163 difference in the colonization ability of the WT and mutant strains (Fig. 2C), suggesting that  
164 colibactin biosynthesis does not contribute to bacterial fitness in this model of gut colonization.

165

166 **Flagella are not required for ExPEC gut colonization.** Flagella are filamentous organelles  
167 comprised of polymers of the flagellin protein FliC (56). Though best known for their role in  
168 motility, flagella can also promote bacterial attachment and biofilm formation, and can potentially  
169 stimulate host inflammatory responses (57, 58). Several studies have provided evidence that  
170 flagella enhance ExPEC colonization of the mouse urinary tract (59-62). In contrast, flagella are  
171 not critical for gut colonization by nonpathogenic *E. coli* in streptomycin-treated mice (63). To  
172 determine if flagella are required for gut colonization by ExPEC in the face of an intact  
173 microbiota, we inoculated adult Balb/c mice with WT F11 or an isogenic mutant lacking *fliC*. In  
174 these assays, no clear differences between the WT strain and F11 $\Delta$ *fliC* were observed (Fig. 2D),  
175 suggesting that flagella do not promote ExPEC fitness in the gut.

176

177 **The pUTI89 plasmid is not important for gut colonization.** Many ExPEC isolates, including  
178 F11, carry plasmids that are identical or closely related to the pUTI89 plasmid that was first  
179 identified in the cystitis isolate UTI89 (64, 65). This plasmid, which is roughly 114 kb in length,

180 encodes conjugation machinery, several virulence factors, and numerous hypothetical genes.  
181 Loss of pUTI89 impairs the fitness and intracellular growth of UTI89 during the early stages of a  
182 UTI in adult mice (66). Likewise, deletion of a closely related plasmid from the neonatal  
183 meningitis *E. coli* isolate RS218 attenuates bacterial virulence during systemic infections in rat  
184 pups (65). In addition, a number of pUTI89-associated genes have been linked with ExPEC  
185 mucus and glucose metabolism *in vitro* (30). To determine if pUTI89 facilitates gut colonization  
186 by F11, an F11 derivative that was cured of the plasmid was tested in our mouse model. The  
187 cured strain exhibited no defect when compared to the WT control strain (Fig. 2E), suggesting  
188 that pUTI89 is dispensable for ExPEC fitness within the gut.

189

190 **Disruption of *fimH* reduces gut colonization fitness, whereas the lack of *papG* has no effect.**

191 ExPEC strains encode many types of hair-like adhesive organelles known as pili, or fimbriae.  
192 Two of the most often-studied ExPEC-associated adhesins are P and type 1 pili (T1P) (67). P pili  
193 terminate with the PapG adhesin, which binds host globoseries glycosphingolipids and can  
194 facilitate bacterial infection of the kidneys. T1P are capped by the mannose-binding adhesin  
195 FimH, which promotes biofilm formation as well as bacterial attachment to and invasion of  
196 bladder epithelial cells. In our non-competitive gut colonization assays in which the WT and  
197 mutant bacterial strains are kept separate, the deletion of either *papG* or *fimH* did not  
198 significantly impair the ability of F11 to colonize the intestinal tract (Fig. 3A and B). However,  
199 in these assays we noted that the  $\Delta$ *fimH* mutant was cleared in 3 out of 10 mice—more than  
200 observed with any of the other tested mutants, though not statistically significant (Fig. 3B).  
201 These results prompted us to examine the *fimH* mutant further using competitive assays in which  
202 the WT and mutant strains are inoculated as a 1:1 mixture into mice via oral gavage. In these and

203 other competitive assays, total ExPEC levels remain fairly steady over time at around  $10^6$  CFU/g  
204 feces, even when ratios of the individual competing ExPEC strains are variable.

205 As a control, we first competed Kan<sup>R</sup>- and Clm<sup>R</sup>-tagged F11 strains against one another  
206 to assess if the resistance cassettes alone compromised bacterial fitness within the intestinal tract.  
207 In these control assays, F11-Kan<sup>R</sup> exhibited a modest defect, amounting to about a 3-fold  
208 decrease relative to F11-Clm<sup>R</sup> on day 14, with a median competitive index (CI; see Methods) of  
209 -0.49 (Fig. 3C). Likewise, no striking differences between F11-Clm<sup>R</sup> and F11 $\Delta$ *papG* (Kan<sup>R</sup>)  
210 were observed in competitive assays, with the exception of a transient 6.8-fold decrease (median  
211 CI of -0.83) in prevalence of the *papG* mutant on day 5 (Fig. 3D). In contrast, when F11 $\Delta$ *fimH*  
212 (Kan<sup>R</sup>) was competed against F11-Clm<sup>R</sup>, the  $\Delta$ *fimH* mutant became progressively worse than the  
213 control strain starting at day 7 post-inoculation (Fig. 3E). By day 10, there was about a 360-fold  
214 reduction in the relative levels of F11 $\Delta$ *fimH* recovered in the feces, reflecting a median CI of  
215 -2.55. In addition, the  $\Delta$ *fimH* mutant began to be cleared as early as day 3, and was not detected  
216 in the feces of nearly half of the mice by day 10 (green, Fig. 3E). In comparison, F11 $\Delta$ *papG*  
217 dropped below levels of detection in only one mouse during the 14-d time course of these  
218 competitive assays (red, Fig. 3D). Of note, the differences between strains indicated in Figs. 3C-  
219 E are not statistically significant when *p* values are corrected for multiple comparisons.  
220 However, the amplitude (effect size) of the phenotypes observed with the  $\Delta$ *fimH* mutant suggests  
221 that disruption of this gene can markedly impair ExPEC persistence within the gut in competitive  
222 assays.

223

224 **T1P expression by F11 is modest following excretion from the gut.** T1P are phase variable,  
225 being turned ON or OFF through recombinase-mediated flipping of an invertible promoter

226 element within the *fim* gene cluster (67). The orientation of this *fim* switch can be monitored and  
227 quantified by PCR as a means to assess levels of T1P expression (68, 69). Within the feces of  
228 mice that are colonized by F11, we found that the *fim* switch is in the ON position in about 25 to  
229 35% of the excreted bacteria recovered on days 5, 9, and 14 post-inoculation (Fig. 3F). This is on  
230 par with results from shaking broth cultures, in which the *fim* switch is skewed towards the OFF  
231 position. These data indicate that T1P expression by feces-associated ExPEC is limited, which  
232 may enable the pathogen to better disseminate either within the intestinal tract or after being  
233 discharged from the host.

234

### 235 **Increased flagellin expression partially explains the colonization defect observed with**

236 **F11 $\Delta$ *fimH***. T1P, and FimH in particular, may enhance ExPEC persistence within the gut via  
237 multiple mechanisms, such as aiding the formation of protective biofilm-like communities or  
238 facilitating bacterial attachment to intestinal tissues (58, 70, 71). However, it is conceivable that  
239 disruption of *fimH* could also reduce ExPEC fitness within the gut via effects on other bacterial  
240 or host processes. Specifically, previous work showed that deletion of the entire *fim* operon in  
241 the ExPEC isolate UTI89 causes the upregulation of FliC with a coordinate increase in  
242 swimming motility (72). This could be problematic for *fim* mutants since it is known that  
243 aberrant overexpression of FliC can impair ExPEC colonization of the gut (5), possibly as a  
244 consequence of FliC-mediated stimulation of host inflammatory responses (57). Furthermore,  
245 within the intestinal tracts of germ-free or streptomycin-treated mice, mutations that reduce  
246 bacterial motility and FliC expression are selected and can promote the persistence of the K12  
247 strain MG1655 (73-75). Together, these observations led us to question if defects in the ability of  
248 F11 $\Delta$ *fimH* to survive within the gut in competitive assays are associated with altered FliC

249 expression.

250 In assessing this possibility, we first noted that deletion of *fimH* does increase the motility  
251 of F11 in swim agar plates (Fig. 4A). This phenotype correlates with augmented FliC expression  
252 (Fig. 4B), as measured by use of the low-copy reporter construct *pfliC-lux* in which the  
253 *luxCDABE* gene cluster encoding bacterial luciferase is transcriptionally fused with the  
254 conserved *fliC* promoter (62). These results mirror those reported for a UTI89 mutant lacking the  
255 entire *fim* operon (72). Interestingly, in our assays the deletion of *papG* in F11 had nearly the  
256 opposite effect of the *fimH* deletion, greatly reducing the motility of F11 and ablating FliC  
257 expression (Fig. 4A-B).

258 To test if FliC contributes to the defects in gut colonization observed with F11 $\Delta$ *fimH*, we  
259 generated a double knockout (DKO) mutant lacking both *fimH* and *fliC*. This mutant  
260 (F11 $\Delta$ *fimH* $\Delta$ *fliC*) is non-motile in swim plates, similar to the single  $\Delta$ *fliC* mutant strain (Fig.  
261 4A). In competitive gut colonization assays with WT F11, the  $\Delta$ *fimH* $\Delta$ *fliC* mutant exhibited less  
262 pronounced deficiencies than F11 $\Delta$ *fimH* (Fig. 4C; compare with Fig. 3E). The greatest defect  
263 was observed at day 14 post-inoculation, at which point F11 $\Delta$ *fimH* $\Delta$ *fliC* was not detected in the  
264 feces of 5 of the 13 mice. Relative to the WT strain, F11 $\Delta$ *fimH* $\Delta$ *fliC* titers were reduced by about  
265 21-fold on day 14, corresponding with a median CI of -1.33. This defect was substantially  
266 smaller than the maximal ~360-fold reduction seen with the single  $\Delta$ *fimH* mutant in competition  
267 with WT F11 on day 10 post-inoculation (see Fig. 3E). In addition, clearance of F11 $\Delta$ *fimH* $\Delta$ *fliC*  
268 was not observed until day 7 post-inoculation (Fig 4C), whereas loss of F11 $\Delta$ *fimH* was evident  
269 starting at day 3 (Fig 3C). In light of the delayed defects seen with F11 $\Delta$ *fimH* $\Delta$ *fliC*, we extended  
270 the assays to day 21. At this point, the median CI value returned close to 0, though  
271 F11 $\Delta$ *fimH* $\Delta$ *fliC* was still undetectable in feces from nearly half of the mice while the WT strain

272 was present in all but one sample (Fig. 4C). Differences between F11 $\Delta$ *fimH* $\Delta$ *fliC* and the WT  
273 strain were not statistically significant, either with or without corrections for multiple  
274 comparisons. The less conspicuous defects seen with F11 $\Delta$ *fimH* $\Delta$ *fliC* in these assays suggest that  
275 aberrant FliC expression does contribute to the compromised persistence of F11 $\Delta$ *fimH* within the  
276 gut.

277

278 **F11 $\Delta$ *fimH* outcompetes F11 $\Delta$ *fimH* $\Delta$ *fliC* within the gut.** To better understand the effects that  
279 the loss of *fimH* and *fliC* have on bacterial fitness during gut colonization, the  $\Delta$ *fimH* $\Delta$ *fliC* and  
280  $\Delta$ *fimH* mutants were directly competed. We hypothesized that the  $\Delta$ *fimH* strain, with heightened  
281 FliC expression, would be outcompeted by the  $\Delta$ *fimH* $\Delta$ *fliC* DKO mutant. However,  
282 F11 $\Delta$ *fimH* $\Delta$ *fliC* exhibited clear and statistically significant defects in comparison with F11 $\Delta$ *fimH*  
283 (Fig 4D). Fecal titers of the DKO mutant were below levels of detection in one out of 15 mice on  
284 day 3 post-inoculation, and by day 14 the DKO mutant was undetectable in the feces of a third of  
285 the animals. At this point, F11 $\Delta$ *fimH* was about 270-fold more abundant than the DKO mutant,  
286 corresponding with a median CI of 2.43. These data, as well results from non-competitive assays  
287 (see Fig. 3B), indicate that the importance of FimH to ExPEC survival within the intestinal tract  
288 is dependent upon the nature of the competing microbes that are present.

289

290 **WT F11 and F11 $\Delta$ *fimH* can outcompete one other in reciprocal serial colonization assays.**

291 To further evaluate FimH requirements within the intestinal tract, we carried out serial  
292 colonization assays in which Balb/c mice were first orally gavaged with WT F11 before the  
293 introduction of F11 $\Delta$ *fimH* 7 d later. Though fecal titers of the  $\Delta$ *fimH* mutant were initially high  
294 and on par with the WT strain, levels of the mutant dropped precipitously and were below the

295 limits of detection in most mice by day 3 post-inoculation (Fig. 5A). In reciprocal experiments,  
296 in which F11 $\Delta$ *fimH* was allowed to colonize the mice prior to instillation of the WT strain,  
297 F11 $\Delta$ *fimH* persisted while WT F11 was cleared from most of the mice by day 10 (Fig. 5B).  
298 These data show that FimH is not strictly required for ExPEC to prevent colonization of the gut  
299 by a new competing strain, though the adhesin does seem to aid this process. In addition, these  
300 results indicate that WT F11 and F11 $\Delta$ *fimH* likely vie for the same intestinal niches, with the  
301 first strain established having the upper hand irrespective of FimH expression.

302

## 303 **DISCUSSION**

304 The concept of coincidental evolution, coupled with phylogenetic analyses, suggests that  
305 the extraintestinal success of ExPEC strains is a by-product of their ability to colonize the gut  
306 (26). A corollary of this hypothesis is that extraintestinal virulence and fitness factors promote  
307 ExPEC colonization of the gut. In support of this possibility, researchers previously showed that  
308 deletion of the seven major pathogenicity islands (PAIs) of the ExPEC isolate 536 not only  
309 reduced the virulence of this pathogen in a murine sepsis model, but also attenuated pathogen  
310 persistence within the gut (5). Here, we set out to determine if the principal of coincidental  
311 evolution could be applied to individual virulence and fitness determinants encoded by the  
312 reference ExPEC strain F11. In non-competitive assays using adult SPF mice, we observed no  
313 defects in intestinal colonization or the persistence of ExPEC mutants lacking *CNF1*, *Usp*,  
314 colibactin, flagellin, or the plasmid pUTI89 (see Fig. 2). Mutants that are missing either *papG* or  
315 *hlyA* exhibited transient colonization defects, but these did not affect longer-term ExPEC  
316 survival within the gut (Figs. 1D, 3A, and 3D ). These results indicate that at least some ExPEC-  
317 linked genes can influence bacterial fitness within the gut, though the effects may be modest.

318 Discerning more unequivocal phenotypes for individual ExPEC-associated loci within the gut  
319 can be complicated and context-dependent, as exemplified by the analysis of  $\Delta fimH$  mutants.

320 In non-competitive assays, we observed no significant differences between WT F11 and  
321 F11 $\Delta fimH$ , although the mutant was cleared from a few mice over the course of the 14-d  
322 experiments (Fig. 3B). This prompted us to test F11 $\Delta fimH$  further using competitive assays with  
323 the WT strain. In these assays, differences between the  $\Delta fimH$  mutant and WT strains were more  
324 distinct, but not significantly so if the data are corrected for multiple comparisons. Still, the fact  
325 that F11 $\Delta fimH$  titers within the feces from nearly half the mice fell below detectable levels by  
326 day 10 post-inoculation suggests that FimH can promote ExPEC persistence within the gut (Fig.  
327 3E). These findings are in line with recently published work showing that intestinal persistence  
328 of the ExPEC isolate UTI89 within streptomycin-treated mice is facilitated by FimH expression  
329 (76). This study, as well as other work with enteric *E. coli* pathogens (71, 77, 78), suggests that  
330 FimH can promote ExPEC interactions with intestinal epithelial cells. In our mouse models, we  
331 observed that F11 is localized primarily within the lumen of the colon, though substantial  
332 numbers of the pathogen are also associated with the colonic tissue (see Fig. S1B). While FimH  
333 may mediate interactions between ExPEC and the intestinal epithelium (76), the adhesin could  
334 also influence pathogen persistence within the gut via effects on other processes, including  
335 biofilm development and the modulation of innate host defenses (58, 70, 79, 80).

336 Defining the contributions of FimH to ExPEC fitness within the gut is further  
337 complicated by the observation that the deletion of *fimH* enhances FliC expression by F11 and  
338 increases motility (Fig. 4). Analysis of a *fliC* and *fimH* DKO mutant in competition with WT F11  
339 indicated that aberrant FliC expression is at least partially responsible for the colonization  
340 defects observed with the  $\Delta fimH$  mutant (Figs. 3E and 4C). This situation mirrors results



341 reported for the ExPEC strain 536, in which reduced intestinal persistence of the mutant lacking  
342 seven PAIs was attributed to FliC overexpression (see above, (5)). The expression of flagella is  
343 generally thought to have mostly detrimental effects on *E. coli* fitness within the gut, possibly  
344 due to an increased burden on bacterial metabolism and the ability of FliC to stimulate host  
345 inflammatory pathways (57, 73-75). However, in competitive assays F11 $\Delta$ *fimH* outperformed  
346 F11 $\Delta$ *fimH* $\Delta$ *fliC*, even though the single mutant is hypermotile (Fig. 4D). One potential  
347 explanation for this finding is that flagella expression might at times be an advantage for *E. coli*  
348 within one or more intestinal niche, as previously suggested (75). This possibility is difficult to  
349 reconcile with the observation that F11 $\Delta$ *fliC* has no substantial defects in our noncompetitive  
350 assays (Fig. 2D). It is plausible that crosstalk among bacterial regulators of motility, T1P  
351 expression, and other adhesins also contribute to the phenotypes observed in our assays with the  
352 *fimH* mutants and other F11 derivatives (81-85), but this will require additional studies to tease  
353 apart.

354         The ability of distinct types of bacteria to utilize different spatial and nutritional niches  
355 within the gut allows for the coexistence of the diverse organisms that comprise the intestinal  
356 microbiota, and helps provide a barrier against colonization by newly arriving microbes (86).  
357 This latter effect, known as colonization resistance, is one reason that it is generally necessary to  
358 treat mice with an antibiotic like streptomycin to open up niches for incoming bacteria that are  
359 delivered into the gastrointestinal tract by oral gavage (32). A striking feature of our  
360 experimental system is that F11 is able to colonize and persist indefinitely within the intestinal  
361 tract of conventional SPF mice without the need to first administer antibiotics (Fig. 1A). Our  
362 group and others have recently reported similar results with distinct ExPEC isolates in different  
363 mouse strain backgrounds (24, 29, 31, 87). ExPEC may be able to effectively colonize our

364 untreated mice because they have very low numbers of endogenous *E. coli* and other  
365 Enterobacteriaceae based on 16S rRNA gene sequencing and selective plating assays (CR  
366 Russell and MA Mulvey, unpublished data). Nevertheless, these animals are still resistant to  
367 colonization by the K12 strain MG1655, indicating that MG1655 lacks one or more genes that  
368 ExPEC employs to persist within the gut. When in competition with F11, MG1655 is cleared  
369 from the gut at a notably faster rate than in noncompetitive assays (see Fig. 1), suggesting that  
370 these two strains compete for the same intestinal niches.

371 A better understanding of the survival mechanisms used by ExPEC within the intestinal  
372 tract may aid the development of more efficacious probiotics, while also elucidating new  
373 therapeutic strategies to combat ExPEC before it is able to disseminate and cause disease at sites  
374 beyond the intestinal tract. The effectiveness of such approaches may be dependent on multiple  
375 variables, including timing, the makeup of the microbiota, and the presence of specific  
376 competing strains that can alter ExPEC requirements for individual fitness determinants. For  
377 example, in contrast to the situation in competitive assays, F11 $\Delta$ *fimH* has no trouble colonizing  
378 the gut in noncompetitive experiments and, once established, this mutant can even persist when  
379 challenged with the WT strain (see Figs. 3B and 5B). Thus, while FimH can facilitate ExPEC  
380 persistence within the gut in some settings, it is not always an absolute requirement. This  
381 conclusion may help reconcile results from older studies in which the expression of T1P was  
382 found to be unnecessary for *E. coli* persistence within the intestinal tracts of rodents and human  
383 infants (88-90).

384 Context-dependent variability in the phenotypic effects of fitness determinants like FimH  
385 may complicate treatment approaches, as well as our ability to discern how life within the gut  
386 affects the evolution of ExPEC virulence traits. Nevertheless, data presented here indicate that it

387 is reasonable to apply the principle of coincidental evolution to some ExPEC-associated genes,  
388 though the phenotypic effects of these genes may be modest and variable dependent on the  
389 experimental system that is used. The lack of easily discernable phenotypes for ExPEC-  
390 associated loci within the gut suggests that selective forces encountered within other niches have  
391 also helped shape ExPEC genomes. For example, extraintestinal virulence has been correlated  
392 with the ability of ExPEC strains to resist killing by amoebae (91), while T1P expression has  
393 been linked with the transmission of ExPEC between individuals by promoting transient  
394 colonization of the oropharynx (88). In total, the results presented here show that piecing  
395 together the evolutionary history of ExPEC virulence and fitness traits is a complicated task.  
396 However, continuing efforts to resolve this problem will provide a more detailed picture of  
397 ExPEC ecology and may help identify niche-specific fitness determinants that could be attractive  
398 targets for therapeutic intervention.

399

## 400 **MATERIALS AND METHODS**

401 **Bacterial strains.** The cystitis isolate F11 and the K-12 strain MG1655 were genetically  
402 modified using lambda-red recombination that was facilitated by the pKM208 plasmid (92).  
403 Most of the constructs used for recombination were created by PCR using either pKD4 or pKD3  
404 as a template to amplify a kanamycin or chloramphenicol resistance cassette, respectively,  
405 flanked by ~40 base pairs of DNA with homology to the target insertion site. In some cases,  
406 longer homology regions were required, and three-part PCR was performed. This was done by  
407 PCR amplification of an antibiotic resistance cassette and regions that are upstream and  
408 downstream of the target gene. Primers used were designed to contain sections of homology to  
409 allow the three PCR products to be stitched together in a single ligation reaction.

410 The pCP20 plasmid was used to remove the resistance cassette as necessary (93). To cure  
411 F11 of the pUTI89 plasmid, the *ccdAB* toxin-antitoxin system was replaced with a *tetA-sacB*  
412 construct and spontaneous loss of the plasmid was selected for on LB agar plates containing  
413 fusaric acid and sucrose, as explained previously (94). The strains used in this study are listed in  
414 Table S1 along with the primers used to create them. Prior to lambda-red recombination, bacteria  
415 were grown shaking in LB broth at 37°C. All growth in petri dishes was done using LB agar  
416 supplemented with chloramphenicol (20 µg/ml), kanamycin (50 µg/ml), or ampicillin (50  
417 µg/ml), as appropriate.

418 **Mouse gut colonization.** Mice were handled in accordance with protocols approved by  
419 the Institutional Animal Care and Use Committee at the University of Utah (Protocol number 15-  
420 12015), following US federal guidelines indicated by the Office of Laboratory Animal Welfare  
421 (OLAW) and described in the Guide for the Care and Use of Laboratory Animals, 8th Edition.

422 Prior to inoculation into mice, bacteria were grown statically from frozen stocks for 24 h  
423 at 37°C in 250 ml flasks containing 20 ml of modified M9 media [ $\text{MgSO}_4 \cdot 7\text{H}_2\text{O}$  (1 mM),  
424  $\text{CaCl}_2 \cdot 2\text{H}_2\text{O}$  (0.1 mM), D-(+)-glucose (0.1%), nicotinic acid (0.00125%), thiamine HCl  
425 (0.00165%), casamino acids (0.2%),  $\text{Na}_2\text{HPO}_4$  (6g/L),  $\text{KH}_2\text{PO}_4$  (3 g/L),  $\text{NH}_4\text{Cl}$  (1 g/L), and NaCl  
426 (0.5 g/L) in water]. A total of 12 ml of culture (6 ml of each culture for competitive experiments)  
427 was centrifuged at 8,000 X g for 10 min. Bacterial pellets were then washed once and  
428 resuspended in 0.5 ml of PBS. To inoculate the mouse gastrointestinal tract, 7-8 week old  
429 female, specific pathogen free (SPF) Balb/c or C57Bl/6 mice (The Jackson Laboratory) were  
430 orally gavaged with 50 µl PBS containing  $\sim 10^9$  CFU of bacteria. At various time points post-  
431 inoculation, individual mice were briefly placed into unused takeout boxes for weighing and  
432 feces collection. Feces were homogenized in 1 ml of 0.7% NaCl and then samples were briefly

433 centrifuged to pellet insoluble debris. Supernatants were serially diluted and spread onto LB agar  
434 plates containing either chloramphenicol (20 µg/ml) or kanamycin (50 µg/ml) to select for  
435 growth of the relevant bacterial strains. Prior to gavage, fecal samples were analyzed to ensure  
436 that there were no endogenous bacteria present that were resistant to chloramphenicol or  
437 kanamycin. Mice were housed 3-5 per cage, and were allowed to eat (irradiated Teklad Global  
438 Soy Protein-Free Extruded chow) and drink antibiotic-free water *ad libitum*. Competitive indices  
439 (CIs) were calculated as the ratio of mutant over WT bacteria recovered in the feces divided by  
440 the ratio of mutant over WT bacteria in the inoculum, as noted previously (30).

441 To determine F11 (specifically F11-Clm<sup>R</sup>) titers within the various regions of the  
442 gastrointestinal tract at 14 d post-inoculation, mice were anaesthetized via isoflurane,  
443 euthanized by cervical dislocation, and the cecum, colon, small intestine, and stomach were  
444 removed. The small intestine was divided into thirds, with the portion closest to the stomach  
445 labeled “proximal” and the portion closest to the cecum labeled “distal”. A part of each organ  
446 was weighed and placed into a Safe-Lock tube (Eppendorf) with three 3.2 mm stainless steel  
447 beads, and homogenized using the Bullet Blender (Next Advance). The homogenates were then  
448 serially diluted and plated onto LB agar plates containing chloramphenicol (20 µg/mL) to  
449 quantify the levels of F11-*clmR* present.

450 For histology, colon tissues were fixed in 10% neutral buffered formalin and submitted to  
451 the University of Utah Research Histology core for processing and staining with hematoxylin  
452 and eosin (H&E). Uninfected intestinal tissues and tissues recovered from mice at 14 d post-  
453 inoculation with either MG1655 or F11Δ*hlyA* were used for comparison. Random colon tissue  
454 sections from 5 or more mice in each experimental group were analyzed in a blinded fashion by  
455 a trained pathologist (M.P. Bronner).

456           **Motility Assays.** To test the swimming ability of particular strains, motility agar plates  
457 were made by pouring 25 mL of LB soft agar (0.1% agar) into a petri dish. Bacteria (1.5 µl from  
458 an overnight culture) were dispensed just below the surface of the plate, which was then  
459 incubated at 37° C for 8-10 h prior to imaging with a Stratagene Eagle Eye II System.

460           **Luciferase assays.** The *pfliC-lux* construct was kindly provided by the Mobley lab (62).  
461 Overnight shaking cultures of F11, F11Δ*papG*, and F11Δ*fimH* carrying *pfliC-lux* were diluted  
462 1:100 into 1 ml of fresh tryptone broth (Fisher Scientific) containing ampicillin (50 µg/ml).  
463 Three 100-µl-aliquots of each culture were then transferred to a white 96-well polystyrene plate  
464 (Dynex Technologies) and grown statically at 37°C. Luminescent emission spectra were  
465 collected every 30 minutes for 4.5 hours using Gen5 Software with a BioTek Synergy H1 plate  
466 reader. The instrument was set to integrate readings over 10 seconds using a gain of 135 and  
467 height of 1 mm. Before each reading, the plates were shaken for 1 second. Corresponding growth  
468 curves, which were obtained by taking OD<sub>600</sub> measurements of cultures grown statically in clear  
469 96-well polystyrene plates (CytoOne), showed that the strains used in these assays grew  
470 similarly.

471           **Analysis of the *fim* switch.** Quantification of the *fim* switch in the ON and OFF positions  
472 was DNA was carried out essentially as previously described (68, 69). DNA was purified from  
473 feces using the ZR Fecal DNA MiniPrep kit, whereas DNA was purified from broth cultures  
474 using the Promega Wizard Genomic DNA Purification kit. To skew the *fim* switch towards the  
475 ON position, F11 was grown statically at 37°C in 20 mL LB broth in 250 mL Erlenmeyer flasks  
476 for 24 h, sub-cultured 1:1000 into fresh LB broth, and then incubated for another 24 h. To drive  
477 the *fim* switch towards the OFF position, bacteria were grown shaking in LB broth to exponential  
478 phase. The primers F11\_ *fimS*\_F (TACCGCCAGTAATGCTGCTC) and

479 F11\_fimS\_R (GTCCCACCATTAACCGTCGT) were used to amplify the *fim* switch region by  
480 PCR using the following thermocycler conditions: 95°C for 5 minutes, 10 cycles (95°C for 30  
481 sec, 60°C for 20 sec, 72°C for 40 sec), followed by 30 cycles (95°C for 30 sec, 56°C for 20 sec,  
482 72°C for 40 sec), and ending with a 5 min incubation at 72°C. The reaction products were  
483 column purified, digested with HinfI for 1 h at 37°C, resolved in 1% agarose gels, and imaged.  
484 Bands representing the *fim* switch in the ON and OFF positions were quantified using ImageJ.

485 **Statistical Analysis.** All statistical tests were carried out using GraphPad Prism or  
486 Stata/IC-14 software. Where indicated, corrections for multiple comparisons were made using  
487 the Hochberg procedure (95). *P* values  $\leq 0.05$  were considered significant.

488

#### 489 **FUNDING INFORMATION**

490 This work was supported by NIH grant AI095647 and by seed grants provided by the University  
491 of Utah and the Pathology Department. The funders had no role in study design, data collection  
492 and interpretation, or the decision to submit the work for publication.

493

#### 494 **ACKNOWLEDGMENTS**

495 We are grateful to members of the Mulvey Lab for their insightful conversations and advice. We  
496 are also indebted to the Office of Comparative Medicine at the University of Utah for their  
497 assistance with animal care.

498

499 **REFERENCES**

- 500 1. Blount ZD. 2015. The unexhausted potential of *E. coli*. *Elife* 4.
- 501 2. Bezirtzoglou E. 1997. The intestinal microflora during the first weeks of life. *Anaerobe*  
502 3:173-7.
- 503 3. Human Microbiome Project C. 2012. Structure, function and diversity of the healthy  
504 human microbiome. *Nature* 486:207-14.
- 505 4. Tenailon O, Skurnik D, Picard B, Denamur E. 2010. The population genetics of  
506 commensal *Escherichia coli*. *Nat Rev Microbiol* 8:207-17.
- 507 5. Diard M, Garry L, Selva M, Mosser T, Denamur E, Matic I. 2010. Pathogenicity-  
508 associated islands in extraintestinal pathogenic *Escherichia coli* are fitness elements  
509 involved in intestinal colonization. *J Bacteriol* 192:4885-93.
- 510 6. Karpman D, Stahl AL. 2014. Enterohemorrhagic *Escherichia coli* Pathogenesis and the  
511 Host Response. *Microbiol Spectr* 2.
- 512 7. Rolhion N, Darfeuille-Michaud A. 2007. Adherent-invasive *Escherichia coli* in  
513 inflammatory bowel disease. *Inflamm Bowel Dis* 13:1277-83.
- 514 8. Arthur JC, Perez-Chanona E, Muhlbauer M, Tomkovich S, Uronis JM, Fan TJ, Campbell  
515 BJ, Abujamel T, Dogan B, Rogers AB, Rhodes JM, Stintzi A, Simpson KW, Hansen JJ,  
516 Keku TO, Fodor AA, Jobin C. 2012. Intestinal inflammation targets cancer-inducing  
517 activity of the microbiota. *Science* 338:120-3.
- 518 9. Arthur JC, Gharaibeh RZ, Muhlbauer M, Perez-Chanona E, Uronis JM, McCafferty J,  
519 Fodor AA, Jobin C. 2014. Microbial genomic analysis reveals the essential role of  
520 inflammation in bacteria-induced colorectal cancer. *Nat Commun* 5:4724.
- 521 10. Schultz M, Strauch UG, Linde HJ, Watzl S, Obermeier F, Gottl C, Dunger N, Grunwald  
522 N, Scholmerich J, Rath HC. 2004. Preventive effects of *Escherichia coli* strain Nissle  
523 1917 on acute and chronic intestinal inflammation in two different murine models of  
524 colitis. *Clin Diagn Lab Immunol* 11:372-8.
- 525 11. Deriu E, Liu JZ, Pezeshki M, Edwards RA, Ochoa RJ, Contreras H, Libby SJ, Fang FC,  
526 Raffatellu M. 2013. Probiotic bacteria reduce *Salmonella typhimurium* intestinal  
527 colonization by competing for iron. *Cell Host Microbe* 14:26-37.
- 528 12. Vila J, Saez-Lopez E, Johnson JR, Romling U, Dobrindt U, Canton R, Giske CG, Naas T,  
529 Carattoli A, Martinez-Medina M, Bosch J, Retamar P, Rodriguez-Bano J, Baquero F,  
530 Soto SM. 2016. *Escherichia coli*: an old friend with new tidings. *FEMS Microbiol Rev*  
531 doi:10.1093/femsre/fuw005.
- 532 13. Barber AE, Norton JP, Spivak AM, Mulvey MA. 2013. Urinary tract infections: current  
533 and emerging management strategies. *Clin Infect Dis* 57:719-24.



- 534 14. Barber AE, Norton JP, Wiles TJ, Mulvey MA. 2016. Strengths and limitations of model  
535 systems for the study of urinary tract infections and related pathologies. *Microbiol Mol*  
536 *Biol Rev* 80:351-67.
- 537 15. Moreno E, Andreu A, Pigrau C, Kuskowski MA, Johnson JR, Prats G. 2008. Relationship  
538 between *Escherichia coli* strains causing acute cystitis in women and the fecal *E. coli*  
539 population of the host. *J Clin Microbiol* 46:2529-34.
- 540 16. Chen SL, Wu M, Henderson JP, Hooton TM, Hibbing ME, Hultgren SJ, Gordon JI. 2013.  
541 Genomic diversity and fitness of *E. coli* strains recovered from the intestinal and urinary  
542 tracts of women with recurrent urinary tract infection. *Sci Transl Med* 5:184ra60.
- 543 17. Foxman B, Manning SD, Tallman P, Bauer R, Zhang L, Koopman JS, Gillespie B, Sobel  
544 JD, Marrs CF. 2002. Uropathogenic *Escherichia coli* are more likely than commensal *E.*  
545 *coli* to be shared between heterosexual sex partners. *Am J Epidemiol* 156:1133-40.
- 546 18. Yamamoto S, Tsukamoto T, Terai A, Kurazono H, Takeda Y, Yoshida O. 1997. Genetic  
547 evidence supporting the fecal-perineal-urethral hypothesis in cystitis caused by  
548 *Escherichia coli*. *J Urol* 157:1127-9.
- 549 19. Russo TA, Stapleton A, Wenderoth S, Hooton TM, Stamm WE. 1995. Chromosomal  
550 restriction fragment length polymorphism analysis of *Escherichia coli* strains causing  
551 recurrent urinary tract infections in young women. *J Infectious Dis* 172:440-5.
- 552 20. Nowrouzian FL, Wold AE, Adlerberth I. 2005. *Escherichia coli* strains belonging to  
553 phylogenetic group B2 have superior capacity to persist in the intestinal microflora of  
554 infants. *J Infect Dis* 191:1078-83.
- 555 21. Nowrouzian FL, Adlerberth I, Wold AE. 2006. Enhanced persistence in the colonic  
556 microbiota of *Escherichia coli* strains belonging to phylogenetic group B2: role of  
557 virulence factors and adherence to colonic cells. *Microbes Infect* 8:834-40.
- 558 22. Smati M, Clermont O, Le Gal F, Schichmanoff O, Jaureguy F, Eddi A, Denamur E,  
559 Picard B, Coliville G. 2013. Real-time PCR for quantitative analysis of human  
560 commensal *Escherichia coli* populations reveals a high frequency of subdominant  
561 phylogroups. *Appl Environ Microbiol* 79:5005-12.
- 562 23. Rosen DA, Hooton TM, Stamm WE, Humphrey PA, Hultgren SJ. 2007. Detection of  
563 intracellular bacterial communities in human urinary tract infection. *PLoS Med* 4:e329.
- 564 24. Turret J, Willing BP, Croxen MA, Dufour N, Dion S, Wachtel S, Denamur E, Finlay  
565 BB. 2016. Small intestine early innate immunity response during intestinal colonization  
566 by *Escherichia coli* depends on its extra-intestinal virulence status. *PLoS One*  
567 11:e0153034.
- 568 25. Manges AR, Johnson JR, Foxman B, O'Bryan TT, Fullerton KE, Riley LW. 2001.  
569 Widespread distribution of urinary tract infections caused by a multidrug-resistant  
570 *Escherichia coli* clonal group. *N Engl J Med* 345:1007-13.

- 571 26. Le Gall T, Clermont O, Gouriou S, Picard B, Nassif X, Denamur E, Tenailon O. 2007.  
572 Extraintestinal virulence is a coincidental by-product of commensalism in B2  
573 phylogenetic group *Escherichia coli* strains. Mol Biol Evol 24:2373-84.
- 574 27. Levin BR. 1996. The evolution and maintenance of virulence in microparasites. Emerg  
575 Infect Dis 2:93-102.
- 576 28. Wold AE, Caugant DA, Lidin-Janson G, de Man P, Svanborg C. 1992. Resident colonic  
577 *Escherichia coli* strains frequently display uropathogenic characteristics. J Infect Dis  
578 165:46-52.
- 579 29. Norton JP, Mulvey MA. 2012. Toxin-antitoxin systems are important for niche-specific  
580 colonization and stress resistance of uropathogenic *Escherichia coli*. PLoS Pathog  
581 8:e1002954.
- 582 30. Russell CW, Richards AC, Chang AS, Mulvey MA. 2017. The rhomboid protease GlpG  
583 promotes the persistence of extraintestinal pathogenic *Escherichia coli* within the gut.  
584 Infect Immun doi:10.1128/IAI.00866-16.
- 585 31. Russell CW, Mulvey MA. 2015. The extraintestinal pathogenic *Escherichia coli* factor  
586 RqII constrains the genotoxic effects of the RecQ-Like helicase RqIH. PLoS Pathog  
587 11:e1005317.
- 588 32. Myhal ML, Laux DC, Cohen PS. 1982. Relative colonizing abilities of human fecal and  
589 K 12 strains of *Escherichia coli* in the large intestines of streptomycin-treated mice. Eur J  
590 Clin Microbiol 1:186-92.
- 591 33. Troeger H, Richter JF, Beutin L, Gunzel D, Dobrindt U, Epple HJ, Gitter AH, Zeitz M,  
592 Fromm M, Schulzke JD. 2007. *Escherichia coli* alpha-haemolysin induces focal leaks in  
593 colonic epithelium: a novel mechanism of bacterial translocation. Cell Microbiol 9:2530-  
594 40.
- 595 34. Bucker R, Schulz E, Gunzel D, Bojarski C, Lee IF, John LJ, Wiegand S, Janssen T,  
596 Wieler LH, Dobrindt U, Beutin L, Ewers C, Fromm M, Siegmund B, Troeger H,  
597 Schulzke JD. 2014. alpha-Haemolysin of *Escherichia coli* in IBD: a potentiator of  
598 inflammatory activity in the colon. Gut 63:1893-901.
- 599 35. Wiegand S, Zakrzewski SS, Eichner M, Schulz E, Gunzel D, Pieper R, Rosenthal R,  
600 Barmeyer C, Bleich A, Dobrindt U, Schulzke JD, Bucker R. 2017. Zinc treatment is  
601 efficient against *Escherichia coli* alpha-haemolysin-induced intestinal leakage in mice.  
602 Sci Rep 7:45649.
- 603 36. Welch RA. 2016. Uropathogenic *Escherichia coli*-associated exotoxins. Microbiol Spectr  
604 4.
- 605 37. Fiorentini C, Arancia G, Caprioli A, Falbo V, Ruggeri FM, Donelli G. 1988. Cytoskeletal  
606 changes induced in HEp-2 cells by the cytotoxic necrotizing factor of *Escherichia coli*.  
607 Toxicon 26:1047-56.

- 608 38. Caprioli A, Falbo V, Roda LG, Ruggeri FM, Zona C. 1983. Partial purification and  
609 characterization of an *Escherichia coli* toxic factor that induces morphological cell  
610 alterations. *Infect Immun* 39:1300-6.
- 611 39. Smith YC, Rasmussen SB, Grande KK, Conran RM, O'Brien AD. 2008. Hemolysin of  
612 uropathogenic *Escherichia coli* evokes extensive shedding of the uroepithelium and  
613 hemorrhage in bladder tissue within the first 24 hours after intraurethral inoculation of  
614 mice. *Infect Immun* 76:2978-90.
- 615 40. Rippere-Lampe KE, Lang M, Ceri H, Olson M, Lockman HA, O'Brien AD. 2001.  
616 Cytotoxic necrotizing factor type 1-positive *Escherichia coli* causes increased  
617 inflammation and tissue damage to the prostate in a rat prostatitis model. *Infect Immun*  
618 69:6515-9.
- 619 41. Rippere-Lampe KE, O'Brien AD, Conran R, Lockman HA. 2001. Mutation of the gene  
620 encoding cytotoxic necrotizing factor type 1 (CNF(1)) attenuates the virulence of  
621 uropathogenic *Escherichia coli*. *Infect Immun* 69:3954-64.
- 622 42. Johnson DE, Drachenberg C, Lockett CV, Island MD, Warren JW, Donnenberg MS.  
623 2000. The role of cytotoxic necrotizing factor-1 in colonization and tissue injury in a  
624 murine model of urinary tract infection. *FEMS Immunol Med Microbiol* 28:37-41.
- 625 43. Kanamaru S, Kurazono H, Ishitoya S, Terai A, Habuchi T, Nakano M, Ogawa O,  
626 Yamamoto S. 2003. Distribution and genetic association of putative uropathogenic  
627 virulence factors *iroN*, *iha*, *kpsMT*, *ompT* and *usp* in *Escherichia coli* isolated from  
628 urinary tract infections in Japan. *J Urol* 170:2490-3.
- 629 44. Bauer RJ, Zhang L, Foxman B, Siitonen A, Jantunen ME, Saxen H, Marrs CF. 2002.  
630 Molecular epidemiology of 3 putative virulence genes for *Escherichia coli* urinary tract  
631 infection-*usp*, *iha*, and *iroN* (*E. coli*). *J Infect Dis* 185:1521-4.
- 632 45. Ostblom A, Adlerberth I, Wold AE, Nowrouzian FL. 2011. Pathogenicity island markers,  
633 virulence determinants *malX* and *usp*, and the capacity of *Escherichia coli* to persist in  
634 infants' commensal microbiotas. *Appl Environ Microbiol* 77:2303-8.
- 635 46. Nipic D, Podlesek Z, Budic M, Crnigoj M, Zgur-Bertok D. 2013. *Escherichia coli*  
636 uropathogenic-specific protein, Usp, is a bacteriocin-like genotoxin. *J Infect Dis*  
637 208:1545-52.
- 638 47. Zaw MT, Yamasaki E, Yamamoto S, Nair GB, Kawamoto K, Kurazono H. 2013.  
639 Uropathogenic specific protein gene, highly distributed in extraintestinal uropathogenic  
640 *Escherichia coli*, encodes a new member of H-N-H nuclease superfamily. *Gut Pathog*  
641 5:13.
- 642 48. Kurazono H, Yamamoto S, Nakano M, Nair GB, Terai A, Chaicumpa W, Hayashi H.  
643 2000. Characterization of a putative virulence island in the chromosome of uropathogenic  
644 *Escherichia coli* possessing a gene encoding a uropathogenic-specific protein. *Microb*  
645 *Pathog* 28:183-9.

- 646 49. Nougayrede JP, Homburg S, Taieb F, Boury M, Brzuszkiewicz E, Gottschalk G,  
647 Buchrieser C, Hacker J, Dobrindt U, Oswald E. 2006. *Escherichia coli* induces DNA  
648 double-strand breaks in eukaryotic cells. *Science* 313:848-51.
- 649 50. Cuevas-Ramos G, Petit CR, Marcq I, Boury M, Oswald E, Nougayrede JP. 2010.  
650 *Escherichia coli* induces DNA damage in vivo and triggers genomic instability in  
651 mammalian cells. *Proc Natl Acad Sci U S A* 107:11537-42.
- 652 51. Taieb F, Petit C, Nougayrede JP, Oswald E. 2016. Distribution and genetic association of  
653 putative uropathogenic virulence factors *iroN*, *iha*, *kpsMT*, *ompT* a. *EcoSal Plus* 7.
- 654 52. McCarthy AJ, Martin P, Cloup E, Stabler RA, Oswald E, Taylor PW. 2015. The  
655 genotoxin colibactin is a determinant of virulence in *Escherichia coli* K1 experimental  
656 neonatal systemic infection. *Infect Immun* 83:3704-11.
- 657 53. Marcq I, Martin P, Payros D, Cuevas-Ramos G, Boury M, Watrin C, Nougayrede JP,  
658 Olier M, Oswald E. 2014. The genotoxin colibactin exacerbates lymphopenia and  
659 decreases survival rate in mice infected with septicemic *Escherichia coli*. *J Infect Dis*  
660 210:285-94.
- 661 54. Payros D, Secher T, Boury M, Brehin C, Menard S, Salvador-Cartier C, Cuevas-Ramos  
662 G, Watrin C, Marcq I, Nougayrede JP, Dubois D, Bedu A, Garnier F, Clermont O,  
663 Denamur E, Plaisancie P, Theodorou V, Fioramonti J, Olier M, Oswald E. 2014.  
664 Maternally acquired genotoxic *Escherichia coli* alters offspring's intestinal homeostasis.  
665 *Gut Microbes* 5:313-25.
- 666 55. Homburg S, Oswald E, Hacker J, Dobrindt U. 2007. Expression analysis of the colibactin  
667 gene cluster coding for a novel polyketide in *Escherichia coli*. *FEMS Microbiol Lett*  
668 275:255-62.
- 669 56. Morimoto YV, Minamino T. 2014. Structure and function of the bi-directional bacterial  
670 flagellar motor. *Biomolecules* 4:217-34.
- 671 57. Cullender TC, Chassaing B, Janzon A, Kumar K, Muller CE, Werner JJ, Angenent LT,  
672 Bell ME, Hay AG, Peterson DA, Walter J, Vijay-Kumar M, Gewirtz AT, Ley RE. 2013.  
673 Innate and adaptive immunity interact to quench microbiome flagellar motility in the gut.  
674 *Cell Host Microbe* 14:571-81.
- 675 58. Pratt LA, Kolter R. 1998. Genetic analysis of *Escherichia coli* biofilm formation: roles of  
676 flagella, motility, chemotaxis and type I pili. *Mol Microbiol* 30:285-93.
- 677 59. Haugen BJ, Pellett S, Redford P, Hamilton HL, Roesch PL, Welch RA. 2007. In vivo  
678 gene expression analysis identifies genes required for enhanced colonization of the  
679 mouse urinary tract by uropathogenic *Escherichia coli* strain CFT073 *dsdA*. *Infect*  
680 *Immun* 75:278-89.
- 681 60. Wright KJ, Seed PC, Hultgren SJ. 2005. Uropathogenic *Escherichia coli* flagella aid in  
682 efficient urinary tract colonization. *Infect Immun* 73:7657-68.

- 683 61. Lane MC, Lockett V, Monterosso G, Lamphier D, Weinert J, Hebel JR, Johnson DE,  
684 Mobley HL. 2005. Role of motility in the colonization of uropathogenic *Escherichia coli*  
685 in the urinary tract. *Infect Immun* 73:7644-56.
- 686 62. Lane MC, Alteri CJ, Smith SN, Mobley HL. 2007. Expression of flagella is coincident  
687 with uropathogenic *Escherichia coli* ascension to the upper urinary tract. *Proc Natl Acad*  
688 *Sci U S A* 104:16669-74.
- 689 63. McCormick BA, Laux DC, Cohen PS. 1990. Neither motility nor chemotaxis plays a role  
690 in the ability of *Escherichia coli* F-18 to colonize the streptomycin-treated mouse large  
691 intestine. *Infect Immun* 58:2957-61.
- 692 64. Chen SL, Hung CS, Xu J, Reigstad CS, Magrini V, Sabo A, Blasiar D, Bieri T, Meyer  
693 RR, Ozersky P, Armstrong JR, Fulton RS, Latreille JP, Spieth J, Hooton TM, Mardis ER,  
694 Hultgren SJ, Gordon JI. 2006. Identification of genes subject to positive selection in  
695 uropathogenic strains of *Escherichia coli*: a comparative genomics approach. *Proc Natl*  
696 *Acad Sci U S A* 103:5977-82.
- 697 65. Wijetunge DS, Karunathilake KH, Chaudhari A, Katani R, Dudley EG, Kapur V,  
698 DebRoy C, Kariyawasam S. 2014. Complete nucleotide sequence of pRS218, a large  
699 virulence plasmid, that augments pathogenic potential of meningitis-associated  
700 *Escherichia coli* strain RS218. *BMC Microbiol* 14:203.
- 701 66. Cusumano CK, Hung CS, Chen SL, Hultgren SJ. 2010. Virulence plasmid harbored by  
702 uropathogenic *Escherichia coli* functions in acute stages of pathogenesis. *Infect Immun*  
703 78:1457-67.
- 704 67. Russell CW, Mulvey MA. 2014. Type 1 and P pili of uropathogenic *Escherichia coli*., p  
705 49-70. In Barocchi MA, Telford JL (ed), *Bacterial pili: structure, synthesis and role in*  
706 *disease*, 1 ed doi:10.1079/9781780642550.0049. CAB International, Wallingford, UK.
- 707 68. Roesch PL, Blomfield IC. 1998. Leucine alters the interaction of the leucine-responsive  
708 regulatory protein (Lrp) with the fim switch to stimulate site-specific recombination in  
709 *Escherichia coli*. *Mol Microbiol* 27:751-61.
- 710 69. Floyd KA, Moore JL, Eberly AR, Good JA, Shaffer CL, Zaver H, Almqvist F, Skaar EP,  
711 Caprioli RM, Hadjifrangiskou M. 2015. Adhesive fiber stratification in uropathogenic  
712 *Escherichia coli* biofilms unveils oxygen-mediated control of type 1 pili. *PLoS Pathog*  
713 11:e1004697.
- 714 70. Nowrouzian FL, Friman V, Adlerberth I, Wold AE. 2007. Reduced phase switch capacity  
715 and functional adhesin expression of type 1-fimbriated *Escherichia coli* from  
716 immunoglobulin A-deficient individuals. *Infect Immun* 75:932-40.
- 717 71. Sheikh A, Rashu R, Begum YA, Kuhlman FM, Ciorba MA, Hultgren SJ, Qadri F,  
718 Fleckenstein JM. 2017. Highly conserved type 1 pili promote enterotoxigenic *E. coli*  
719 pathogen-host interactions. *PLoS Negl Trop Dis* 11:e0005586.



- 720 72. Greene SE, Pinkner JS, Chorell E, Dodson KW, Shaffer CL, Conover MS, Livny J,  
721 Hadjifrangiskou M, Almqvist F, Hultgren SJ. 2014. Pilicide ec240 disrupts virulence  
722 circuits in uropathogenic *Escherichia coli*. *MBio* 5:e02038.
- 723 73. Leatham MP, Stevenson SJ, Gauger EJ, Krogfelt KA, Lins JJ, Haddock TL, Autieri SM,  
724 Conway T, Cohen PS. 2005. Mouse intestine selects nonmotile *flhDC* mutants of  
725 *Escherichia coli* MG1655 with increased colonizing ability and better utilization of  
726 carbon sources. *Infect Immun* 73:8039-49.
- 727 74. Giraud A, Arous S, De Paepe M, Gaboriau-Routhiau V, Bambou JC, Rakotobe S,  
728 Lindner AB, Taddei F, Cerf-Bensussan N. 2008. Dissecting the genetic components of  
729 adaptation of *Escherichia coli* to the mouse gut. *PLoS Genet* 4:e2.
- 730 75. Gauger EJ, Leatham MP, Mercado-Lubo R, Laux DC, Conway T, Cohen PS. 2007. Role  
731 of motility and the *flhDC* Operon in *Escherichia coli* MG1655 colonization of the mouse  
732 intestine. *Infect Immun* 75:3315-24.
- 733 76. Spaulding CN, Klein RD, Ruer S, Kau AL, Schreiber HL, Cusumano ZT, Dodson KW,  
734 Pinkner JS, Fremont DH, Janetka JW, Remaut H, Gordon JI, Hultgren SJ. 2017. Selective  
735 depletion of uropathogenic *E. coli* from the gut by a FimH antagonist. *Nature* 546:528-  
736 532.
- 737 77. Boudeau J, Barnich N, Darfeuille-Michaud A. 2001. Type 1 pili-mediated adherence of  
738 *Escherichia coli* strain LF82 isolated from Crohn's disease is involved in bacterial  
739 invasion of intestinal epithelial cells. *Mol Microbiol* 39:1272-84.
- 740 78. Barnich N, Carvalho FA, Glasser AL, Darcha C, Jantscheff P, Allez M, Peeters H,  
741 Bommelaer G, Desreumaux P, Colombel JF, Darfeuille-Michaud A. 2007. CEACAM6  
742 acts as a receptor for adherent-invasive *E. coli*, supporting ileal mucosa colonization in  
743 Crohn disease. *J Clin Invest* 117:1566-74.
- 744 79. Ashkar AA, Mossman KL, Coombes BK, Gyles CL, Mackenzie R. 2008. FimH adhesin  
745 of type 1 fimbriae is a potent inducer of innate antimicrobial responses which requires  
746 TLR4 and type 1 interferon signalling. *PLoS Pathog* 4:e1000233.
- 747 80. Bollinger RR, Everett ML, Wahl SD, Lee YH, Orndorff PE, Parker W. 2006. Secretory  
748 IgA and mucin-mediated biofilm formation by environmental strains of *Escherichia coli*:  
749 role of type 1 pili. *Mol Immunol* 43:378-87.
- 750 81. Snyder JA, Haugen BJ, Lockatell CV, Maroncle N, Hagan EC, Johnson DE, Welch RA,  
751 Mobley HL. 2005. Coordinate expression of fimbriae in uropathogenic *Escherichia coli*.  
752 *Infect Immun* 73:7588-96.
- 753 82. Holden NJ, Totsika M, Mahler E, Roe AJ, Catherwood K, Lindner K, Dobrindt U, Gally  
754 DL. 2006. Demonstration of regulatory cross-talk between P fimbriae and type 1 fimbriae  
755 in uropathogenic *Escherichia coli*. *Microbiology* 152:1143-53.

- 756 83. Xia Y, Gally D, Forsman-Semb K, Uhlin BE. 2000. Regulatory cross-talk between  
757 adhesin operons in *Escherichia coli*: inhibition of type 1 fimbriae expression by the PapB  
758 protein. EMBO J 19:1450-7.
- 759 84. Cooper LA, Simmons LA, Mobley HL. 2012. Involvement of mismatch repair in the  
760 reciprocal control of motility and adherence of uropathogenic *Escherichia coli*. Infect  
761 Immun 80:1969-79.
- 762 85. Lane MC, Simms AN, Mobley HL. 2007. Complex interplay between type 1 fimbrial  
763 expression and flagellum-mediated motility of uropathogenic *Escherichia coli*. J  
764 Bacteriol 189:5523-33.
- 765 86. Lawley TD, Walker AW. 2013. Intestinal colonization resistance. Immunology 138:1-11.
- 766 87. Green SI, Ajami NJ, Ma L, Poole NM, Price RE, Petrosino JF, Maresso AW. 2015.  
767 Murine model of chemotherapy-induced extraintestinal pathogenic *Escherichia coli*  
768 translocation. Infect Immun 83:3243-56.
- 769 88. Bloch CA, Stocker BA, Orndorff PE. 1992. A key role for type 1 pili in enterobacterial  
770 communicability. Mol Microbiol 6:697-701.
- 771 89. Tullus K, Kuhn I, Orskov I, Orskov F, Mollby R. 1992. The importance of P and type 1  
772 fimbriae for the persistence of *Escherichia coli* in the human gut. Epidemiol Infect  
773 108:415-21.
- 774 90. McCormick BA, Franklin DP, Laux DC, Cohen PS. 1989. Type 1 pili are not necessary  
775 for colonization of the streptomycin-treated mouse large intestine by type 1-piliated  
776 *Escherichia coli* F-18 and E. coli K-12. Infect Immun 57:3022-9.
- 777 91. Adiba S, Nizak C, van Baalen M, Denamur E, Depaulis F. 2010. From grazing resistance  
778 to pathogenesis: the coincidental evolution of virulence factors. PLoS One 5:e11882.
- 779 92. Murphy KC, Campellone KG. 2003. Lambda Red-mediated recombinogenic engineering  
780 of enterohemorrhagic and enteropathogenic *E. coli*. BMC Mol Biol 4:11.
- 781 93. Datsenko KA, Wanner BL. 2000. One-step inactivation of chromosomal genes in  
782 *Escherichia coli* K-12 using PCR products. Proc Natl Acad Sci U S A 97:6640-5.
- 783 94. Li XT, Thomason LC, Sawitzke JA, Costantino N, Court DL. 2013. Positive and negative  
784 selection using the tetA-sacB cassette: recombineering and P1 transduction in  
785 *Escherichia coli*. Nucleic Acids Res 41:e204.
- 786 95. Wright SP. 1993. Adjusted p-values for simultaneous inference. Biometrics 48:1005-  
787 1013.
- 788
- 789

790 **FIGURE LEGENDS**

791 **Figure 1. ExPEC colonizes and persists within the gut of SPF mice without causing serious**  
792 **pathology.** Adult female SPF Balb/c mice were inoculated via oral gavage with  $\sim 10^9$  CFU of  
793 bacteria. (A) Titers of F11 recovered from the feces of mice at various time points post-gavage.  
794  $n=5$  mice. (B) F11 titers within intestinal tissues at 14 d post-gavage. (C) Mice were gavaged  
795 with a 1:1 mixture of F11 and MG1655, and fecal titers were determined for both populations at  
796 the indicated time points. \*,  $p \leq 0.05$  by Wilcoxon signed-rank tests with corrections for multiple  
797 comparisons. (D) Fecal titers from non-competitive assays in which mice were orally inoculated  
798 with F11, F11 $\Delta hlyA$ , or MG1655. \*\*\*\*,  $p \leq 0.0001$  by Mann-Whitney U Tests with corrections  
799 for multiple comparisons. #,  $p \leq 0.05$  by Mann-Whitney U Tests without corrections. In A-D,  
800 bars indicate median values. (E) Relative weights (mean values  $\pm$  SD) of mice following oral  
801 inoculation with F11, F11 $\Delta hlyA$ , or MG1655. Data were normalized to the mass of each mouse  
802 prior to gavage. \*\*\*,  $p \leq 0.001$  with corrections when F11 is compared to either F11 $\Delta hlyA$  or  
803 MG1655 by unpaired Student's *t* tests. In B-E,  $n=10$  mice from two independent experiments.

804  
805 **Figure 2. Key ExPEC-associated factors are not required for gut colonization.** Mice were  
806 orally gavaged with  $\sim 10^9$  CFU of WT F11 or isogenic mutant strains lacking (A) *cnfI*, (B) *usp*,  
807 (C) *clbCDEFG*, (D) *fliC*, or (E) plasmid p*UTI89*. At the indicated time points, feces were  
808 collected, homogenized, and plated on selective media to determine bacterial titers. Bars  
809 represent median values.  $n=9-11$  mice from two independent experiments. No statistically  
810 significant differences between WT and mutant titers were discerned using Mann-Whitney U  
811 tests.

812



813 **Figure 3. The persistence of F11 $\Delta$ *fimH*, but not F11 $\Delta$ *papG*, within the gut is impaired in**  
814 **competitive assays.** Mice were gavaged with WT F11, (A) F11 $\Delta$ *papG*, or (B) F11 $\Delta$ *fimH* and  
815 fecal titers were determined at the indicated time points. In these non-competitive assays, no  
816 significant differences were identified by Mann-Whitney U tests. For competitive assays, mice  
817 were gavaged with a 1:1 mixture of (C) F11-Kan<sup>R</sup> and F11-Clm<sup>R</sup>, (D) WT F11 and F11 $\Delta$ *papG*,  
818 (E) or WT F11 and F11 $\Delta$ *fimH*. \*,  $p \leq 0.05$  by one sample *t* tests without correction for multiple  
819 comparisons. Pie charts in (E) indicate fraction of mice in which F11 $\Delta$ *fimH* (green) was not  
820 detected. #,  $p \leq 0.05$  by Fisher's exact tests without corrections. In A-E, n = 11-13 mice from  
821 two independent assays. (F) Graph shows fractions of the *fim* switch in the ON and OFF  
822 positions from fecal samples recovered from mice following oral inoculation with F11. Bars  
823 indicate mean values  $\pm$  SEM; n=5-10 mice. Results from F11 grown in static or shaking LB  
824 broth are shown for comparison.

825

826 **Figure 4. Flagellin expression impacts the efficacy of gut colonization by F11 $\Delta$ *fimH*.** (A)  
827 WT F11 and the indicated mutant derivatives were inoculated into motility agar to assess  
828 swimming. Images of swim plates were taken at 8-10 h post-inoculation and are representative of  
829 results from three independent assays. (B) Plot shows results from *fliC* expression reporter assays  
830 with WT F11, F11 $\Delta$ *fimH*, and F11 $\Delta$ *papG* carrying *pfliC-lux*. Lines indicate mean luminescence  
831 values  $\pm$  SEM from three independent assays performed in triplicate.  $p \leq 0.05$  by multiple *t* tests  
832 with (\*) or without (#) corrections for multiple comparisons. (C-D) Graphs show results from  
833 competitive assays in which mice were orally gavaged with a 1:1 mixture of (C) WT F11 and  
834 F11 $\Delta$ *fimH* $\Delta$ *fliC* (DKO) bacteria or (D) F11 $\Delta$ *fimH* and F11 $\Delta$ *fimH* $\Delta$ *fliC* (DKO). Fecal titers of  
835 each strain were determined at the indicated time points by plating on selective media. \*,  $p \leq$

836 0.05 by one sample *t* tests with corrections for multiple comparisons. Pie charts in (C-D) denote  
837 the fraction of mice in which the DKO mutant (yellow), WT F11 (blue), or F11 $\Delta$ *fimH* (green)  
838 were not detected. No significant differences were discerned by Fisher's exact tests. n=13-15  
839 mice from at least two independent assays.

840

841 **Figure 5. Pre-colonization of mice with F11 $\Delta$ *fimH* effectively limits colonization by the WT**  
842 **strain, and vice versa.** Balb/c mice were inoculated via oral gavage with (A) WT F11  
843 (specifically F11-Clm<sup>R</sup>) and then with F11 $\Delta$ *fimH* (Kan<sup>R</sup>) 7 d later. (B) Alternatively, mice were  
844 inoculated with F11 $\Delta$ *fimH* followed 7 d later by the WT strain. Solid lines connect median fecal  
845 titers of each strain over time. The zero time point (dotted line) indicates when the second strain  
846 (WT F11 or F11 $\Delta$ *fimH*) was introduced. \*, *p*<0.05 by Mann-Whitney U tests with corrections for  
847 multiple measurements; n=5 mice.

848

849 **Supplemental Figure S1. F11, but not MG1655, effectively colonizes the intestinal tract of**  
850 **SPF C57Bl/6 mice.** Adult female SPF C57Bl/6 mice were inoculated via oral gavage with  $\sim 10^9$   
851 CFU of either F11 or MG1655. (A) Graph shows titers of F11 and MG1655 recovered from the  
852 feces at various time points post-gavage. n=10 mice from two independent non-competitive  
853 assays. \*\*, *p*<0.01 by Wilcoxon signed-rank tests, with corrections for multiple comparisons. (B)  
854 F11 titers recovered in association with the colonic tissue or within the lumen of the colon at 14  
855 d post-gavage. *P* value determined by Mann-Whitney test; n=10 mice.

856

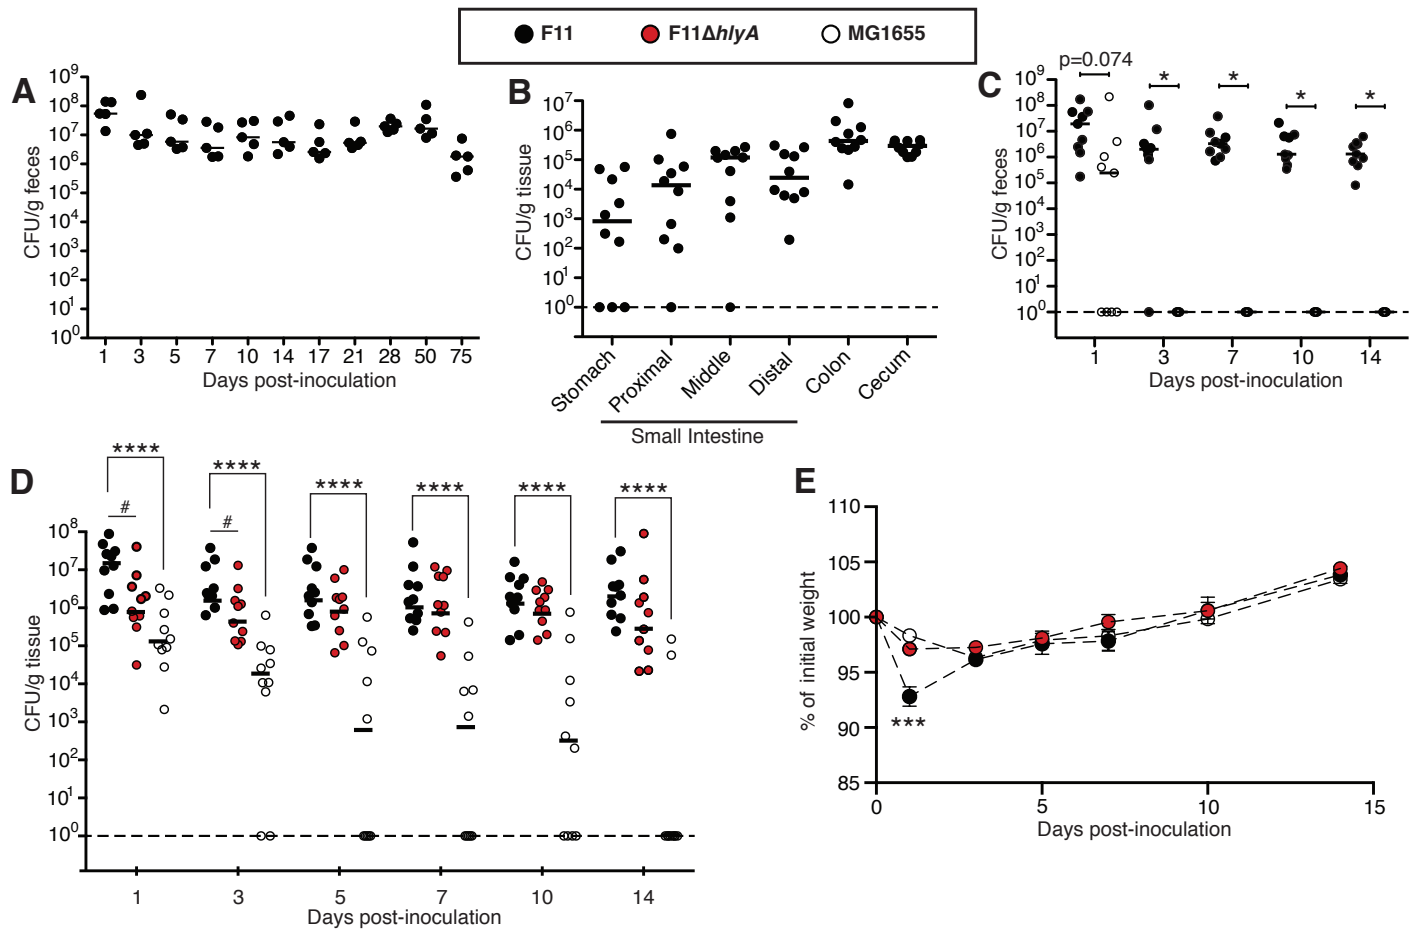

**Figure 1. ExPEC colonizes and persists within the gut of SPF mice without causing serious pathology.** Adult female SPF Balb/c mice were inoculated via oral gavage with  $\sim 10^9$  CFU of bacteria. (A) Titers of F11 recovered from the feces of mice at various time points post-gavage.  $n=5$  mice. (B) F11 titers within intestinal tissues at 14 d post-gavage. (C) Mice were gavaged with a 1:1 mixture of F11 and MG1655, and fecal titers were determined for both populations at the indicated time points. \*,  $p \leq 0.05$  by Wilcoxon signed-rank tests with corrections for multiple comparisons. (D) Fecal titers from non-competitive assays in which mice were orally inoculated with F11, F11Δ*hlyA*, or MG1655. \*\*\*\*,  $p \leq 0.0001$  by Mann-Whitney U Tests with corrections for multiple comparisons. #,  $p \leq 0.05$  by Mann-Whitney U Tests without corrections. In A-D, bars indicate median values. (E) Relative weights (mean values  $\pm$  SD) of mice following oral inoculation with F11, F11Δ*hlyA*, or MG1655. Data were normalized to the mass of each mouse prior to gavage. \*\*\*,  $p \leq 0.001$  with corrections when F11 is compared to either F11Δ*hlyA* or MG1655 by unpaired Student's *t* tests. In B-E,  $n=10$  mice from two independent experiments.

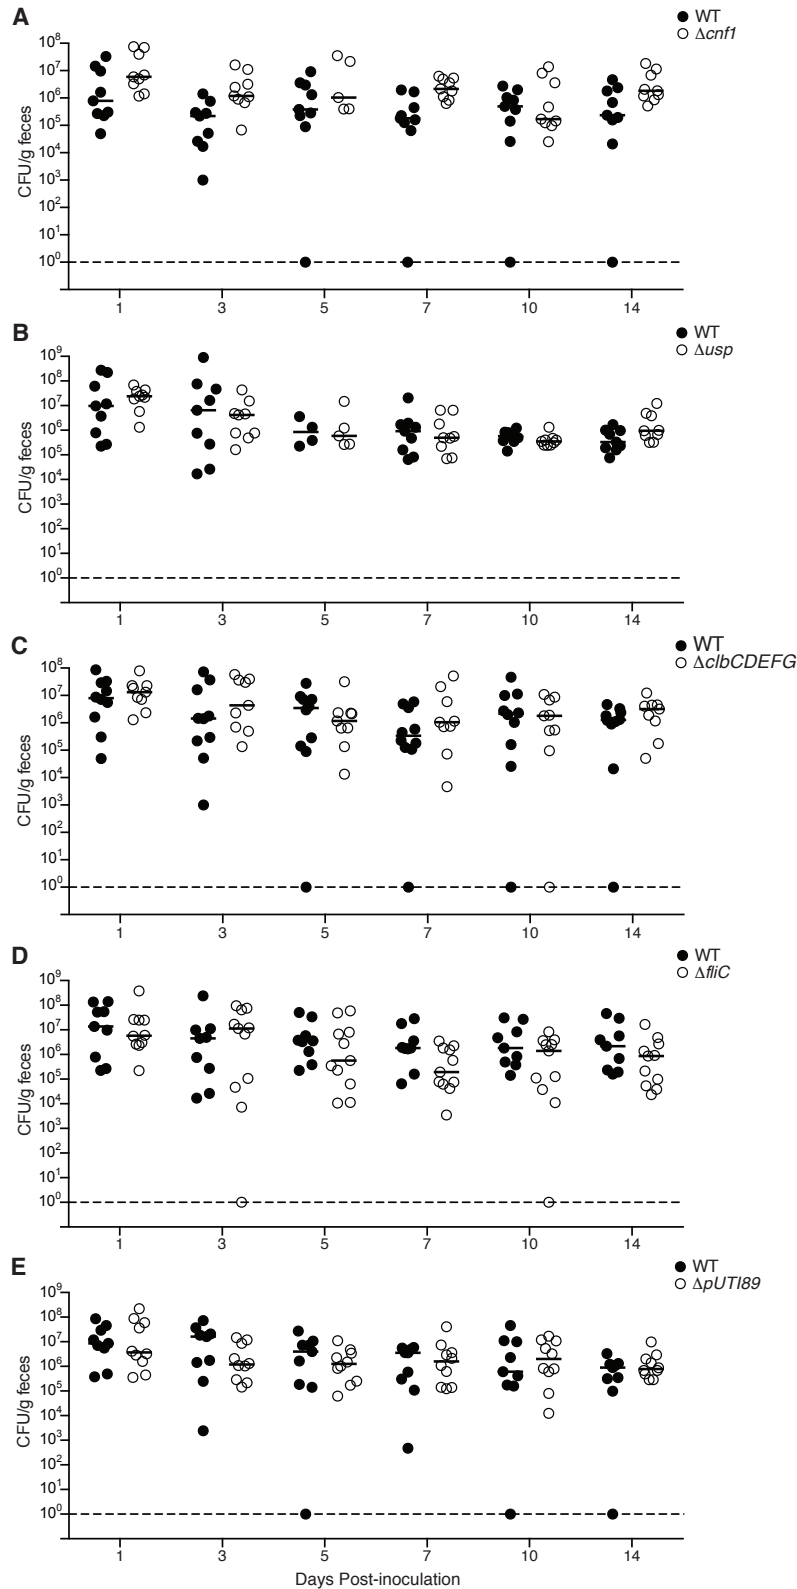

**Figure 2. Key ExPEC-associated factors are not required for gut colonization.** Mice were orally gavaged with  $\sim 10^9$  CFU of WT F11 or isogenic mutant strains lacking (A) *cnf1*, (B) *usp*, (C) *clbCDEFG*, (D) *fliC*, or (E) plasmid *pUTI89*. At the indicated time points, feces were collected, homogenized, and plated on selective media to determine bacterial titers. Bars represent median values.  $n=9-11$  mice from two independent experiments. No statistically significant differences between WT and mutant titers were discerned using Mann-Whitney U tests.

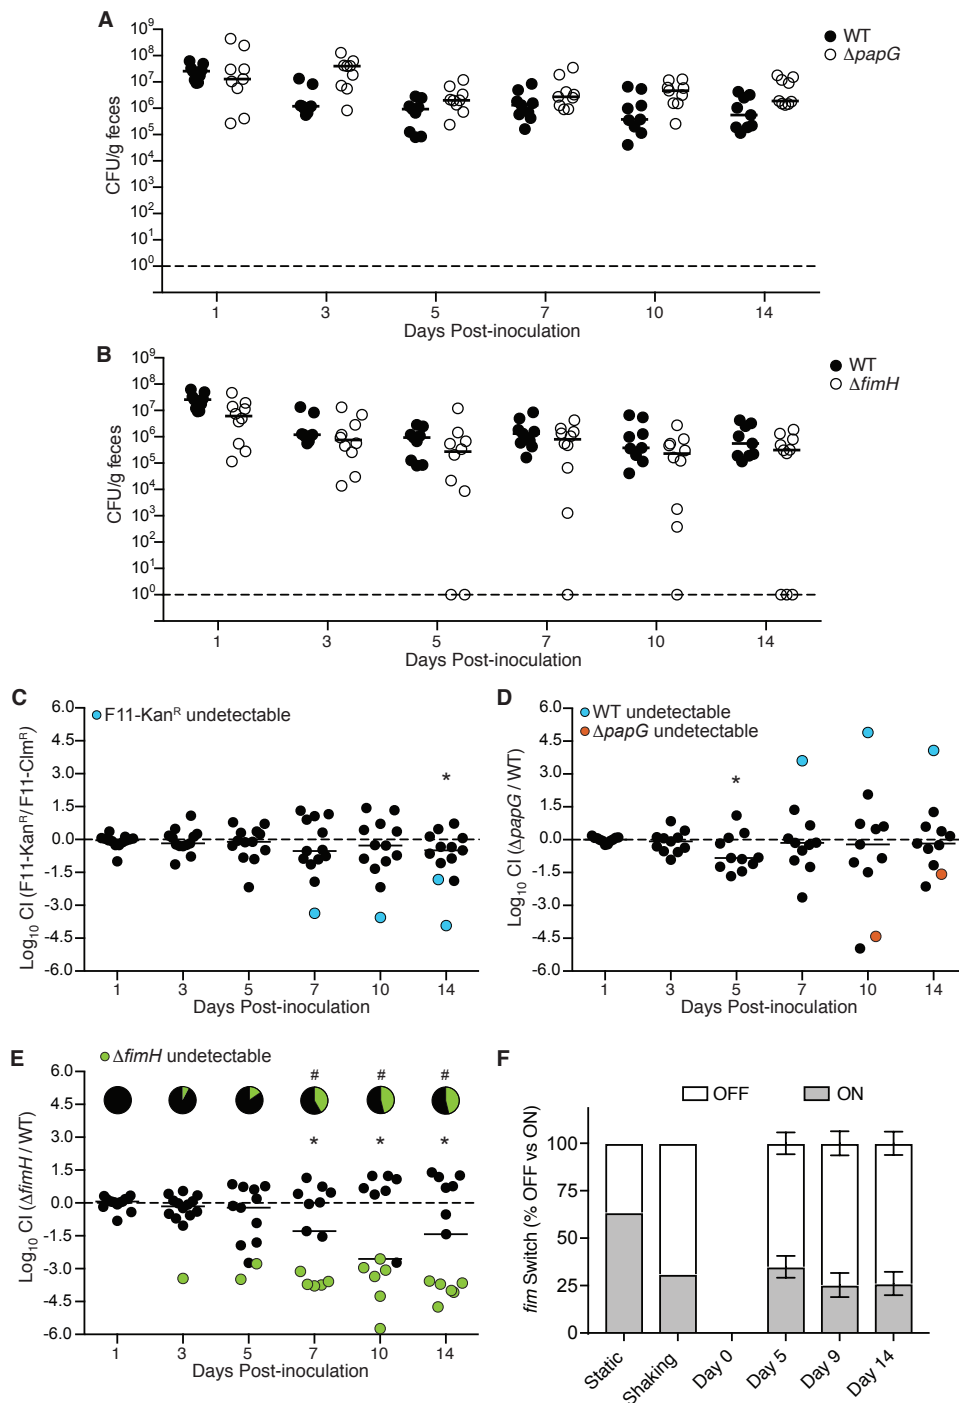

**Figure 3. The persistence of F11 $\Delta fimH$ , but not F11 $\Delta papG$ , within the gut is impaired in competitive assays.**

Mice were gavaged with WT F11, (A) F11 $\Delta papG$ , or (B) F11 $\Delta fimH$  and fecal titers were determined at the indicated time points. In these non-competitive assays, no statistical significant differences were identified by Mann-Whitney U tests. For competitive assays, mice were gavaged with a 1:1 mixture of (C) F11-Kan<sup>R</sup> and F11-Clm<sup>R</sup>, (D) WT F11 and F11 $\Delta papG$ , (E) or WT F11 and F11 $\Delta fimH$ . \*,  $p \leq 0.05$  by one sample  $t$  tests without correction for multiple comparisons. Pie charts in (E) indicate fraction of mice in which F11 $\Delta fimH$  (green) was not detected. #,  $p \leq 0.05$  by Fisher's exact tests without corrections. In A-E,  $n = 11-13$  mice from two independent assays. (F) Graph shows fractions of the *firm* switch in the ON and OFF positions from fecal samples recovered from mice following oral inoculation with F11. Bars indicate mean values  $\pm$  SEM;  $n=5-10$  mice. Results from F11 grown in static or shaking LB broth are shown for comparison.

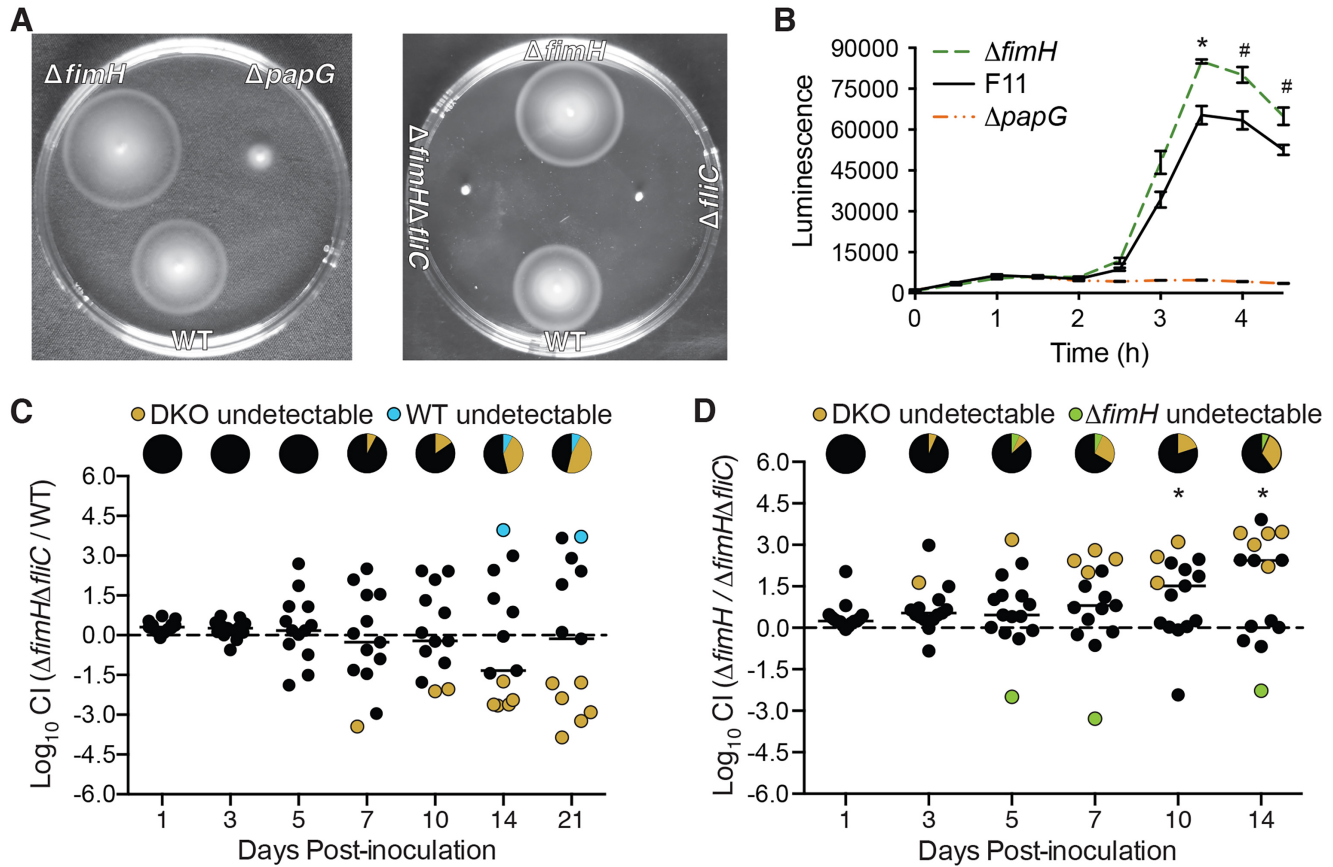

**Figure 4. Flagellin expression impacts the efficacy of gut colonization by F11 $\Delta fimH$ .** (A) WT F11 and the indicated mutant derivatives were inoculated into motility agar to assess swimming. Images of swim plates were taken at 8-10 h post-inoculation and are representative of results from three independent assays. (B) Plot shows results from *fliC* expression reporter assays with WT F11, F11 $\Delta fimH$ , and F11 $\Delta papG$  carrying *pfliC-lux*. Lines indicate mean luminescence values  $\pm$  SEM from three independent assays performed in triplicate.  $p \leq 0.05$  by multiple *t* tests with (\*) or without (#) corrections for multiple comparisons. (C-D) Graphs show results from competitive assays in which mice were orally gavaged with a 1:1 mixture of (C) WT F11 and F11 $\Delta fimH\Delta fliC$  (DKO) bacteria or (D) F11 $\Delta fimH$  and F11 $\Delta fimH\Delta fliC$  (DKO). Fecal titers of each strain were determined at the indicated time points by plating on selective media. \*,  $p \leq 0.05$  by one sample *t* tests with corrections for multiple comparisons. Pie charts in (C-D) denote the fraction of mice in which the DKO mutant (yellow), WT F11 (blue), or F11 $\Delta fimH$  (green) were not detected. No significant differences were discerned by Fisher's exact tests. n=13-15 mice from at least two independent assays.

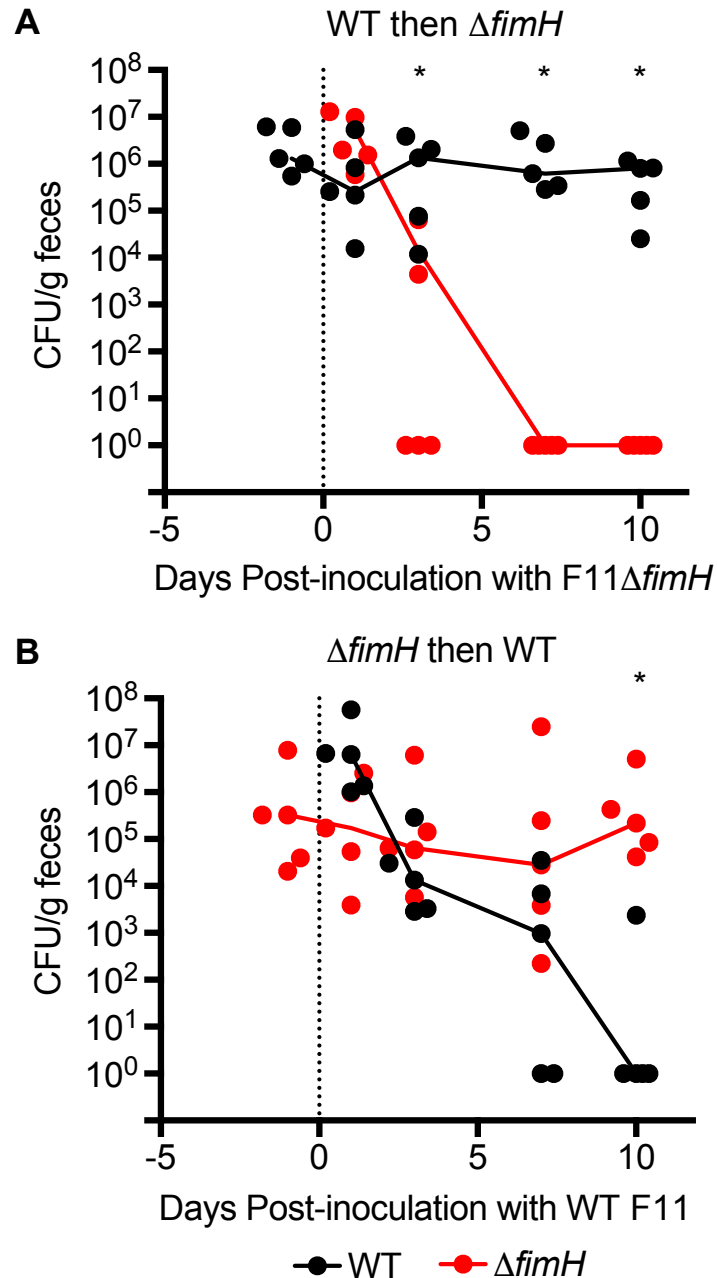

**Figure 5. Pre-colonization of mice with F11 $\Delta fimH$  effectively limits colonization by the WT strain, and vice versa.** Balb/c mice were inoculated via oral gavage with (A) WT F11 (specifically F11-CIm<sup>R</sup>) and then with F11 $\Delta fimH$  (Kan<sup>R</sup>) 7 d later. (B) Alternatively, mice were inoculated with F11 $\Delta fimH$  followed 7 d later by the WT strain. Solid lines connect median fecal titers of each strain over time. The zero time point (dotted line) indicates when the second strain (WT F11 or F11 $\Delta fimH$ ) was introduced. \*,  $p < 0.05$  by Mann-Whitney U tests with corrections for multiple measurements;  $n = 5$  mice.



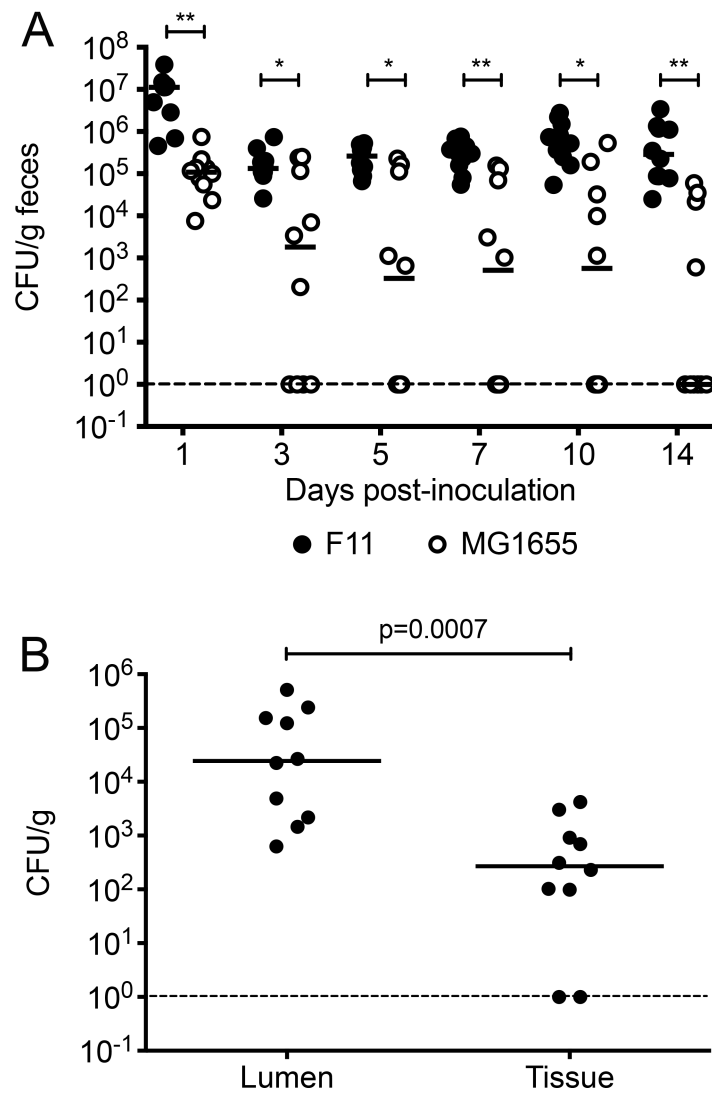

**Supplemental Figure S1. F11, but not MG1655, effectively colonizes the intestinal tract of SPF C57Bl/6 mice.** Adult female SPF C57Bl/6 mice were inoculated via oral gavage with  $\sim 10^9$  CFU of either F11 or MG1655. (A) Graph shows titers of F11 and MG1655 recovered from the feces at various time points post-gavage.  $n=10$  mice from two independent non-competitive assays. \*\*,  $p<0.01$  by Wilcoxon signed-rank tests, with corrections for multiple comparisons. (B) F11 titers recovered in association with the colonic tissue or within the lumen of the colon at 14 d post-gavage.  $P$  value determined by Mann-Whitney test;  $n=10$  mice.

Supplemental Table S1. Bacterial strains used in this study

| Strain                                       | Description                                                                                                                                              | Primers* used to create strain, or reference                                                                                                                                                                                             |
|----------------------------------------------|----------------------------------------------------------------------------------------------------------------------------------------------------------|------------------------------------------------------------------------------------------------------------------------------------------------------------------------------------------------------------------------------------------|
| MG1655:: <i>clm</i>                          | MG1655 derivative in which a chloramphenicol resistance cassette has been inserted at the <i>attTn7</i> site                                             | F: AGGATGTTTGATTAACATAACAGGAAGAAAAATGCTGTGTAGGCTGGAGCTGCTTCG<br>R: ATCGGTTACGGTTGAGTAATAAATGGATGCCCTGCGTAAGCATATGAATATCCTCCTTAG                                                                                                          |
| F11:: <i>clm</i> (F11-Clm <sup>R</sup> )     | F11 with a chromosomal insertion of a chloramphenicol resistance cassette at the intergenic region between genes <i>EcF11_2526</i> and <i>xseA</i>       | 1                                                                                                                                                                                                                                        |
| F11:: <i>kan</i> (F11-Kan <sup>R</sup> )     | F11 with a chromosomal insertion of a kanamycin resistance cassette at the intergenic region between genes <i>EcF11_2526</i> and <i>xseA</i>             | F: TCTGGCGTAGCCTGGGAGTTATTGCCGGATGCGATGCTGGTGTGTAGGCTGGAGCTGCTTCG<br>R: TCACGTAACAAAAACGCTCAATCCGTAGACCGGATAAGAGGCATATGAATATCCTCCTTAG                                                                                                    |
| F11Δ <i>clbCDEFG</i> :: <i>clm</i>           | F11 derivative in which the <i>clbCDEFG</i> operon has been replaced with a chloramphenicol resistance cassette                                          | F1: TCGGGCGATCGATAGATTAG<br>R1: CGAAGCAGCTCCAGCCTACACAGCTTGCATATCCATAAACTTC<br>F2: TGTGTAGGCTGGAGCTGCTTCG<br>R2: CATATGAATATCCTCCTTAG<br>F3: CTAAGGAGGATATTCATATGCCCGTCACGCCATTTACGT<br>R3: TAAATACGCCAGTTGCCGC                          |
| F11Δ <i>cnf1</i> :: <i>kan</i>               | F11 derivative in which the <i>cnf1</i> gene has been replaced with a kanamycin resistance cassette                                                      | F: GATAAGGTGTAGTAAATATTAATCTTACAGAGGAGTGTGTAGGCTGGAGCTGCTTCG<br>R: GGAGTAACATAACAATGGCCAATAAATAATTTCCCGAACATATGAATATCCTCCTTAG                                                                                                            |
| F11Δ <i>fimH</i> :: <i>kan</i>               | F11 derivative in which the <i>fimH</i> gene has been replaced with a kanamycin resistance cassette                                                      | F: TTATTGATAAACAAGTACAGCCAATAATCGATTGCATGTGTAGGCTGGAGCTGCTTCG<br>R: ATGAAACGAGTTATTACCCTGTTTGTGTACTGCTGATGGCATATGAATATCCTCCTTAG                                                                                                          |
| F11Δ <i>fimH</i> Δ <i>fliC</i> :: <i>clm</i> | F11 derivative in which the <i>fimH</i> gene has been deleted, and the <i>fliC</i> gene has been replaced with a chloramphenicol resistance cassette     | See <i>fimH</i> and <i>fliC</i> single knockout primers                                                                                                                                                                                  |
| F11Δ <i>fliC</i> :: <i>kan</i>               | F11 derivative in which the <i>fliC</i> gene was replaced with a kanamycin resistance cassette                                                           | F: ATGGCACAAGTCATTAATACCAACAGCCTCTCGCTGATCTGTGTAGGCTGGAGCTGCTTCG<br>R: TTAACCTCGACGAGAGACAGAACCCTGCTGCGGTACCTGGCATATGAATATCCTCCTTAG                                                                                                      |
| F11Δ <i>hlyA</i> :: <i>kan</i>               | F11 derivative in which the <i>hlyA</i> gene has been replaced with a kanamycin resistance cassette                                                      | 2                                                                                                                                                                                                                                        |
| F11Δ <i>papG</i> :: <i>kan</i>               | F11 derivative in which the <i>papG</i> gene has been replaced with a kanamycin resistance cassette                                                      | F: ATGTTTTACTCGTTTAAATGATAACATTTATCGTCCTCATGTGTAGGCTGGAGCTGCTTCG<br>R: TTATGGCAATATCATGAGCAGCGTTGCTGAACCAGATAGTCATATGAATATCCTCCTTAG                                                                                                      |
| F11Δ <i>usp</i> :: <i>kan</i>                | F11 derivative in which the <i>usp</i> gene has been replaced with a kanamycin resistance cassette                                                       | F: GTGGGCGATATTGTTTACCTGAGAATAATCGGTGAGAATGTGTAGGCTGGAGCTGCTTCG<br>R: TTATCTCTGTAGTGAATCTCATCGTGTAGTCTGGGGGTACATATGAATATCCTCCTTAG                                                                                                        |
| F11:: <i>kan</i> Δ <i>pUTI89</i>             | A derivative of F11:: <i>kan</i> which was cured of the pUTI89 plasmid by replacement of <i>ccdAB</i> with <i>tetA-sacB</i> followed by counterselection | F1: CTGTTTCGTTTATTACGCCG<br>R1: GATAGAGTGTCAACAAAAATTAGGAATGTCAGGCTCCGTTATACAC<br>F2: TCCTAATTTTTGTTGACACTCTATC<br>R2: TTAATCAAAGGGAAAACGTCCATATGC<br>F3: GCATATGGACAGTTTTCCCTTTGATTAAGCACACCTCTTTTGACATACT<br>R3: GTTGTATTCTGGCTTAGTCAG |

References:

- (1) Russell CW, Mulvey MA. 2015. The extraintestinal pathogenic *Escherichia coli* factor RqII constrains the genotoxic effects of the RecQ-like helicase RqIH. *PLoS Pathog.* 11(12):e1005317.
- (2) Wiles TJ, Bower JM, Redd MJ, Mulvey MA. 2009. Use of zebrafish to probe the divergent virulence potentials and toxin requirements of extraintestinal pathogenic *Escherichia coli*. *PLoS Pathog.* 5(12):e1000697.

\* In some cases longer homology arms were created by three-part PCR. In these instances, three primer sets are listed.
